1  
2  
3  
4  
5  
6  
7  
8  
9  
10  
11  
12  
13  
14  
15  
16  
17  
18  
19  
20  
21  
22  
23

# **Evolution of protection after maternal immunization for respiratory syncytial virus in cotton rats**

Jorge C.G. Blanco<sup>2\*</sup>, Lori McGinnes-Cullen<sup>1</sup>, Arash Kamali<sup>2</sup>, Fatoumata Y. D. Sylla<sup>2</sup>,  
Marina S. Boukhavalova<sup>2</sup>, and Trudy G. Morrison<sup>1\*</sup>

*Department of Microbiology and Physiological Systems, University of Massachusetts  
Medical School, Worcester, MA, USA<sup>1</sup>; Sigmovir Biosystems, Inc, Rockville, MD, USA<sup>2</sup>.*

\*Corresponding authors: T. Morrison, J. Blanco

*Email:* [trudy.morrison@umassmed.edu](mailto:trudy.morrison@umassmed.edu),

[j.blanco@sigmovir.com](mailto:j.blanco@sigmovir.com)

Phone: 01-508-856-6592 (Morrison)

01-301-294-8619 (Blanco)

Word count: Abstract 226

Text:7627

**Running Title: Maternal Immunization for Respiratory Syncytial Virus**

## 24 **Abstract**

25  
26 Maternal anti-respiratory syncytial virus (RSV) antibodies acquired by the fetus through  
27 the placenta protect neonates from RSV disease through the first weeks of life. In the cotton rat  
28 model of RSV infections, we previously reported that immunization of dams during pregnancy  
29 with virus-like particles assembled with mutation stabilized pre-fusion F protein as well as the  
30 wild type G protein resulted in robust protection of their offspring from RSV challenge (Blanco,  
31 et al Journal of Virology 93: e00914-19, <https://doi.org/10.1128/JVI.00914-19>). Here we describe  
32 the durability of those protective responses in dams, the durability of protection in offspring, and  
33 the transfer of that protection to offspring of two consecutive pregnancies without a second  
34 boost immunization. We report that four weeks after birth, offspring of the first pregnancy were  
35 significantly protected from RSV replication in both lungs and nasal tissues after RSV challenge,  
36 but protection was reduced in pups at 6 weeks after birth. However, the overall protection of  
37 offspring of the second pregnancy was considerably reduced, even at four weeks of age. This  
38 drop in protection occurred even though the levels of total anti-pre-F IgG and neutralizing  
39 antibody titers in dams remained at similar, high levels before and after the second pregnancy.  
40 The results are consistent with an evolution of antibody properties in dams to populations less  
41 efficiently transferred to offspring or the less efficient transfer of antibodies in elderly dams.

## 42 **Author Summary:**

43 Respiratory syncytial virus (RSV) is a major cause of acute lower respiratory tract infection of  
44 infants. Because there is no licensed vaccine for RSV as well as potential safety issues with any  
45 new vaccine, protection of infants from RSV is problematic. A possible safe approach for infant  
46 protection is the transfer of maternal anti-RSV antibodies, induced by immunization, across the

47 placenta to the fetus serving to protect the newborn for months after birth. In a cotton rat model,  
48 we have previously shown that maternal immunization with virus-like particles assembled with  
49 the RSV F and G proteins protects offspring from RSV infection. Here we describe protection of  
50 offspring, following a single immunization, through two pregnancies showing that offspring of  
51 the first were well protected from RSV challenge. However, offspring of the second pregnancy  
52 were very weakly protected although the levels of total anti-pre-F antibodies and neutralizing  
53 antibody titers in the dams remained at constant and high levels before and after the second  
54 pregnancy. This result is consistent with an evolution of antibody properties in the dams to those  
55 less efficiently transferred to offspring and highlights the importance of appropriate strategies  
56 for maternal immunization, such as immunization during each pregnancy.

57

58

## 59 **Introduction**

60           Respiratory syncytial virus (RSV) is a very common cause of severe acute lower  
61 respiratory tract infections in infants and young children, infections that frequently result in  
62 hospitalization and, in developing countries, significant mortality (1-3). RSV accounts for  
63 approximately three million infections per year world-wide with nearly 200,000 deaths. In the US,  
64 RSV infections are the most common cause of infant doctor visits as well as a significant number  
65 of hospitalizations (3). However, despite decades of effort, no vaccine has yet been licensed.

66           Attempts to develop RSV vaccines have been ongoing since the 1960s. Vaccine development  
67 has focused on the RSV F protein which is more conserved across all strains of RSV than the G  
68 protein and thus should induce protective responses across all strains. The early failures to  
69 identify an effective vaccine were due, in part, to a lack of recognition that the pre-fusion  
70 conformation of the RSV F protein induces optimal protective responses and that this form of F  
71 protein is unstable (4, 5). Another issue is a significant concern about vaccine safety of all  
72 candidates stemming from the failure of formaldehyde treated virus (FI-RSV), an early vaccine  
73 candidate. FI-RSV was not only ineffective in preventing disease but, more importantly, resulted  
74 in life-threatening enhanced respiratory disease (ERD) upon subsequent exposure to infectious  
75 RSV (6-9).

76           Given these considerations, as well as the immunological immaturity of infants and potential  
77 interference of maternal antibodies in infant vaccination (10, 11), a current view is that maternal  
78 immunization with vaccines containing the mutation stabilized pre-fusion F protein is a safe and  
79 efficacious approach for protection of infants against RSV (12-18). Maternal vaccines are  
80 commonly used to protect infants from influenza, tetanus, and pertussis (19-22). It has been  
81 reported that RSV maternal antibody (matAb) acquired by the fetus through the placenta or  
82 lactation has a protective effect on neonates during the first few weeks of life (13, 17, 23-25).  
83 Thus, a goal of the maternal RSV immunization strategy is to increase protective maternal  
84 antibodies (matAbs) in neonates to levels that will extend the time of their protection after birth.

85 We have developed novel virus-like particle (VLP) vaccine candidates for RSV. VLPs robustly  
86 stimulate immune responses without the complications of adjuvant addition due to their display of  
87 repetitive arrays of antigen in a virus-sized particle (26, 27). Because production of VLPs does  
88 not require viral replication, multiple antigens and different conformational forms of antigens can  
89 be assembled into VLPs, in contrast to attenuated viruses which must remain infectious. VLPs  
90 are safer as vaccines for many populations, such as the very young or the very old, compared to  
91 infectious, attenuated, or vector viruses since they do not contain a genome and do not produce  
92 a spreading infection.

93 McLellan et al identified mutations in the RSV F protein (DS-Cav1 mutant) that stabilize the  
94 pre-fusion conformation, and this prototype pre-fusion F protein is now widely used in many  
95 vaccine candidates in different stages of development (5). Subsequently, others have reported  
96 different F protein mutations that are stabilizing (28), one of which, UC-3 F, induces higher  
97 neutralizing antibody (NAb) titers than the widely-used form, DS-Cav1 F (28, 29). We have  
98 assembled VLPs containing the DS-Cav1 or the UC-3 F pre-fusion RSV F proteins along with the  
99 RSV G attachment protein and have established UC-3 F VLP superiority over DS Cav1 F as well  
100 as post-F protein, or wildtype F protein containing VLPs in inducing NAb in both mice and cotton  
101 rats (28, 30). Furthermore, we have tested the efficacy of these pre-F containing VLPs in the  
102 cotton rat model of maternal immunization comparing responses to a post fusion F VLPs as well  
103 as soluble versions of the pre- and post-fusion F proteins (18). In these studies, we have used  
104 RSV-primed animals in order to mimic normal human populations, most of which have been  
105 previously infected with RSV. We have reported that immunization of RSV-primed dams during  
106 pregnancy with pre-F VLPs resulted in robust protection of offspring from RSV challenge with no  
107 evidence of pathology (29-31). Here we describe the durability of these protective responses in  
108 dams after a single immunization and compare the degree of protection these dams can transfer  
109 to their offspring in two consecutive litters. We also assess the durability of protection in offspring  
110 from each of these two consecutive breedings at extended times after birth.

## 111 **Results**

112

### 113 **Infection and Immunization**

114 To evaluate the durability of maternal antibody with time after VLP immunization and the  
115 transfer of protection to offspring, three-week-old female cotton rats were first infected intranasally  
116 (IN) with RSV (RSV-primed, day 0) in order to mimic the RSV-immune condition of the majority  
117 of the adult human population. These animals were then set in breeding pairs at 56 days (breed  
118 1) and immunized at two weeks of gestation (day 70) with one of two different pre-fusion F  
119 containing VLPs, DS-Cav1 F or UC-3 F (Figure 1). Groups of animals were immunized with 25,  
120 75, 100, or 150 micrograms of UC-3 F VLPs, or 100 micrograms of DS-Cav-1 F VLPs. Control  
121 groups were immunized with 100 micrograms of stabilized post fusion F VLPs or re-infected (IN)  
122 with RSV (RSV/RSV). Another group of RSV-primed animals did not receive immunization  
123 (RSV/mock). Litters of pups delivered after the first breeding on or about (day 84) were divided  
124 into two groups, one of which was RSV challenged at 4 weeks after birth while the other was RSV  
125 challenged at 6 weeks after birth (Figure 1). RSV-challenged pups were sacrificed four days after  
126 the challenge for assessment of serum antibody titers as well as virus titers in lungs and nasal  
127 tissue.

128 The same dam cohort was bred again (breed 2) at 158 days after the RSV prime but  
129 without a second immunization (Figure 1). Litters of pups delivered after this second breeding  
130 (on or about day 185), were again divided into two groups, one of which was RSV challenged at  
131 4 weeks after birth while the second at 8 weeks. Four days after challenge, virus titers in lungs  
132 and nasal tissue were determined. Dams were maintained for a total of 318 days after RSV  
133 priming to assess serum antibody levels late in their life. Serum samples from the dams and their  
134 offspring were acquired throughout the protocol at intervals indicated by red arrows in Figure 1  
135 for assessment of immune responses with time after immunization.

### 136 **Durability of anti-pre-F IgG in dams**

137 Sera from each group of dams from each time point were pooled for determination of the  
138 total anti-pre-F IgG by ELISA. The levels of total anti-pre-F IgG antibodies increased significantly  
139 after a pre-F VLP or Post F VLP single immunization at day 70, as we have previously reported  
140 (18, 28, 31) (Figure 2, panels A and B) and remained relatively stable from day 141 to day 277  
141 varying no more than 20%, with the exception of a drop at day 184 to between 43-58% of that on  
142 day 141 (Figure 2, Table 1). Day 184 was just before the delivery of the second breeding. This  
143 drop may be due to the transfer of matAb to the fetus just before delivery, a phenomenon we have  
144 previously observed in primed, unvaccinated females during the first breeding but not in animals  
145 vaccinated during their pregnancy (18). In animals immunized during pregnancy, the serum levels  
146 at day 84 are a combination of increasing antibodies due to vaccination and decreasing levels  
147 due to their transfer to the fetus. This point is supported by the observation that mock immunized  
148 animals were the only group with a decrease in total Pre-F IgG on day 84 (Figure 2, A and B).  
149 However, the levels of total pre-F IgG in the dams recovered by day 231 to levels similar to that  
150 seen in day 141 (Table 1), suggesting their replenishment after pup delivery by anti-pre-F  
151 secreting, bone marrow-associated long-lived plasma cells (LLPC). Indeed, there were  
152 increased anti-pre-F IgG secreting LLPC in immunized animals compared to mock immunized  
153 animals upon sacrifice of the dams on day 318 (Figure 3).

154 Measured levels of total anti-pre-F IgG in all serum samples were consistently slightly  
155 higher when soluble UC-3 F instead of soluble DS-Cav1 was used as target for ELISA (Figure 2,  
156 panels A and B) suggesting either that the UC-3 F target detects a broader range of antibody  
157 specificities than the DS-Cav1 target or that the affinity of antibodies to UC-3 F target is greater  
158 than to DS-Cav1. At most time points and with either target, levels of total anti-pre-F IgG were  
159 higher in sera of UC-3 F VLP immunized animals compared to DS-Cav1 F VLP immunized  
160 animals (Figure 2, A, B). Titers induced by either pre-fusion F VLPs were higher than that induced  
161 by post F VLPs or two consecutive RSV infections (Figure 2). Immunization with different amounts

162 of UC-3 F VLPs made little difference in total anti-pre-F IgG at all times, illustrated by anti-pre-F  
163 IgG in sera from individual animals at days 84 and 141 (Figure 2, panels C-F) (Table 2).

#### 164 **Durability of neutralizing antibody (NAb) in dams**

165 Serum NAb titers stimulated in dams by UC-3 F VLPs were higher than titers stimulated  
166 by DS Cav1 VLPs (Figure 4 A, B), as we have previously reported (28), and titers after either pre-  
167 F VLP immunization were higher than after post-F VLP immunization (Figure 4, panels A-C).  
168 Similar to levels of total anti-pre-F IgG, the dose of UC-3 F VLPs had little impact on NAb titers at  
169 all times after immunization (Figure 4, Panels F-H).

170 In contrast to total anti-pre-F IgG, NAb titers in the dams after immunization with UC-3 F  
171 VLPs remained relatively stable throughout the time course with no statistical differences between  
172 time points of day 84 to 277 (Figure 4). However, titers after DS-Cav1 VLP immunization dropped  
173 at day 141 and 184, and then recovered by day 231 (Figure 4A and B). Titers after post F VLP  
174 immunization dropped slightly at day 184 and then recovered by day 277. Thus, the levels of  
175 dams' NAb titers after pre-F VLP immunization did not necessarily track with the titers of total anti-  
176 pre-F IgG in the respective animals and levels varied with the immunogen. These results  
177 suggested that the NAb generated in the primed dams were a subpopulation of the total anti-  
178 pre-fusion F IgG induced by immunization.

#### 179 **Comparison of total serum anti-pre-F IgG in breed 1 and breed 2 pups**

180 Since levels of total anti-pre-F IgG in the sera of dams remained relatively constant from  
181 day 84 to day 277 with the exception of a transient drop at day 184 (which may reflect transfer to  
182 offspring, Figure 2A and B), we asked if the levels of total maternal pre-F IgG (matAbs) transferred  
183 to offspring were similar in breed 1 vs breed 2. Anti-pre-F IgG levels in breed 1 offspring of pre-  
184 F VLP immunized dams or RSV immunized dams at four weeks after birth were on average 15 to  
185 20% that in the dam sera at day 141 (Figure 5E, F) (Table 3) while that in offspring of dams  
186 immunized with post-F VLP was 35% that in dams. However, in breed 2 pups, the total anti-pre-  
187 F IgG was, on average, 6 to 11% that in dams at day 141 and 30-53% that in sera of breed 1



188 pups (Figure 5, panels E and F) (Table 3) although dam anti-pre-F IgG did not vary significantly  
189 between days 141 and 231. These results suggest that the population of anti-pre-F IgG antibodies  
190 in immunized dams is less efficiently transferred to pups in breed 2 compared to breed 1. As in  
191 the dam sera, the concentration of UC-3 F VLP used as immunogen had little effect on the pup  
192 IgG titers (Figure 5, panels A-D).

### 193 **Comparisons of matNAb titers in sera of breed 1 and breed 2 pups**

194 The matNAb (maternal neutralizing antibodies) titers in sera of all pups from breed 1 were  
195 considerably higher than that in sera of breed 2 pups irrespective of the immunogen used for  
196 dams (Figure 6, panels A and B, respectively) and consistent with the differences in total anti-pre-  
197 F IgG between these two breeds of pups (Figure 5). In this case the dose of the immunogen in  
198 dams made some difference in titers on matNAb in both breeds. The 100  $\mu$ g dose of UC-3 F  
199 VLPs resulted in the highest mean matNAb titers, however, the mean titers in breed 2 pup sera  
200 were considerably lower than those in breed 1 sera, with the mean titer in breed 1 at 7,  $\log_2$ , and  
201 in breed 2 at 5,  $\log_2$ . The mean serum matNAb titers in both breeds of offspring of dams  
202 immunized with DS-Cav-1 or post F VLPs were considerably lower than titers resulting from  
203 immunization with a similar concentration of UC-3 F VLPs.

### 204 **Comparisons of protection by matAb of breed 1 and breed 2 pups from RSV challenge**

205 Titers of virus in lungs and nasal tissues of pups after RSV challenge directly reflects the  
206 extent of protection of the pups by maternal antibodies. The lung and nasal tissue RSV titers in  
207 breed 1 pups (Figure 6, panel C and E respectively) clearly demonstrate that all breed 1 offspring  
208 of dams immunized with any pre-F VLP were significantly protected from replication of the virus  
209 in lung tissue, reducing virus titers by three  $\log_2$  (panel C). However, only UC-3 F VLP  
210 immunization resulted in significant protection from replication in nasal tissues (panel E).  
211 Immunization with 100  $\mu$ g of UC-3 F VLPs resulted in a decrease of two  $\log_2$  of virus (panel E) in  
212 nasal tissue, while maternal immunization using DS-Cav1 F or post-F VLP resulted in, at best, a

213 half log<sub>2</sub> reduction in nasal tissue titer. This result indicated that UC-3 F VLPs immunization  
214 conferred more robust protection than DS Cav1 F VLPs consistent with results previously reported  
215 (28).

216 In contrast, pups born from breed 2 showed much lower protection from replication of the  
217 virus in lung tissue and nasal tissue (Figure 6, panels D and F, respectively). At best, there was  
218 a one Log<sub>2</sub> reduction in virus titers in these tissues, a result consistent with the lower levels of  
219 NAb in these breed 2 animals. Thus, while total anti-pre-F IgG in dams remained relatively  
220 constant, the transfer of matNAbs to their respective pups decreased during a second breeding  
221 and correlated with the decrease in protection. This result may reflect an evolution of the  
222 properties of dam antibodies, with time after immunization, to populations less efficiently  
223 transferred to offspring. Alternatively, placental transfer may not be as efficient in elderly animals.

#### 224 **Durability of Transferred of total anti-pre-F IgG and NAb to offspring.**

225 Since there was significant protection of offspring from RSV challenge four weeks after  
226 birth, particularly in breed 1 pups, we determined the durability of this protection by comparing  
227 the levels total anti-pre-F IgG antibodies, matNAb, and virus titers in lung and nasal tissue in  
228 breed 1 pups at 4 and at 6 weeks after birth. Comparisons of the total anti-pre-F IgG showed  
229 levels at 6 weeks of 40 to 61% that at 4 weeks regardless of the dose of antigen in the dams  
230 (Figure 7, panels A, B). The mean matNAb titers at 6 weeks after birth were 3 Log<sub>2</sub> lower than at  
231 4 weeks after birth (Figure 7, panels C-D). These differences in the matNAb titers translated to  
232 different levels of protection at 4 and 6 weeks after birth from RSV challenge. After challenge,  
233 RSV titers in lungs or in nasal tissue at 4 weeks after birth were 1-2 Log<sub>10</sub> lower than titers at 6  
234 weeks after birth (Figure 7, panels E-H). Thus, in breed 1 pups, the matNAb titers and levels of  
235 protection from an RSV challenge diminished significantly by 6 weeks after birth, however, the  
236 matNAb titers in UC-3 VLP-vaccinated animals remain significantly higher and lung and nose  
237 RSV titers significantly lower than in control offspring of RSV/mock, RSV/RSV, or unvaccinated

238 dams. Furthermore, the durability of protection of offspring of UC-3 F VLP immunized dams was  
239 significantly better than that of offspring of DS Cav1 immunized dams.

240 Breed 2 pups were similarly characterized at 4 weeks and 8 weeks after birth (Figure 8).  
241 While levels of total pre-F IgG were surprisingly similar at 4 and 8 weeks (Figure 8, panels A, B)  
242 the levels of matNAbs were strikingly different (Figure 8, panels C and D). Breed 2 pups at 8  
243 weeks after birth had no detectable matNAb, and were not protected from virus challenge (Figure  
244 8, panels F, I). Thus, levels of protection from RSV challenge in these breed 2 pups is strongly  
245 correlated with the presence of matNAbs, and their steady decrease with the time after birth to  
246 undetectable levels by 8 weeks after birth. This loss of protection was despite the presence of  
247 significant levels of total anti-pre-F maternal IgG antibodies remaining in these animals.

248

## 249 **Discussion**

250 Maternal immunization for protection of offspring from some pathogens, including  
251 influenza, tetanus, and pertussis infections, is routinely used (19-22)). We have previously  
252 reported that, in the cotton rat model of RSV infection, immunization of dams with virus-like  
253 particles assembled with mutation stabilized pre-fusion F proteins as well as wild type G protein  
254 robustly protected offspring from RSV replication in lungs and nasal tissues after virus challenge  
255 (18, 28). Here our goal was to assess the durability of these protective immune responses in  
256 dams through two pregnancies and the durability of transfer of protection to offspring of these two  
257 breeding events. A secondary goal was to determine the influence of different F protein stabilizing  
258 mutations in induction, durability, and transfer of protective responses to offspring as well as the  
259 role of different doses of immunogen on levels of these responses.

260 First, results showed that after a single immunization of RSV primed animals with VLPs  
261 during the first pregnancy, the levels of total anti-pre-F IgG in dams remained stable for up to 277-  
262 318 days after RSV priming with the exception of a significant but transient drop in those levels  
263 just before delivery of offspring of the second breeding, on day 184. This drop in IgG is consistent  
264 with the transfer of antibodies to the pups. However, the anti-pre-F IgG levels in dams rebounded  
265 to levels before the second pregnancy (day 141) suggesting replenishment by bone marrow  
266 associated long-lived plasma cells (LLPC) secreting anti-pre-F IgG. Indeed, these cells were  
267 detected in dams on day 318 at the end of the protocol. Thus, levels of these antibodies in  
268 immunized dams were maintained for most of the life of the animal.

269 We also found that offspring protection and matNAbs responses induced by UC-3 F VLPs  
270 were superior and more durable than those induced by DS Cav1 F VLPs as well as post-F VLPs,  
271 confirming our previous reports of the superiority of the UC-3 F VLPs (28). Additional findings  
272 reported here are that protective responses in dams did not change significantly or reproducibly  
273 with increased doses of immunogen. Furthermore, the results show that immunization with VLPs  
274 assembled with F and G proteins resulted in superior protective responses compared to dams

275 infected with one or two doses of RSV, a result that suggests that vaccine candidates may be  
276 developed that can provide better protection than a natural RSV infection.

277         Perhaps the most significant finding in this study was that, while offspring of the first  
278 breeding of the immunized dams were robustly protected from RSV challenge, the protection  
279 afforded to offspring of the second breeding was considerably reduced. Breed 1 pups had  
280 significantly higher levels of anti-pre-F IgG and NAb titers as well as sharply decreased levels of  
281 RSV in lung and nasal tissue following RSV challenge compared to breed 2 pups. These findings  
282 were surprising since the total anti-pre-F IgG levels in the dams were at high levels prior to the  
283 second breeding and there was evidence of the transfer of the antibodies to the pups just before  
284 the second delivery. In addition, the levels of NAb, at least in UC-3 F VLP immunized dams, were  
285 constant well past the second delivery. The implication of this finding is that dam antibodies were  
286 much less efficiently transferred to their offspring in the second breeding. Indeed, the mean of  
287 levels of anti-pre-F IgG in breed 2 pups was 30-53 % lower than levels in breed 1 pups. This  
288 finding suggests that the antibodies in dams evolved in a way to decrease efficiency of placental  
289 antibody transfer. Alternatively, placental transfer of antibodies may be less efficient in elderly  
290 animals.

291         Time post vaccination could result in changes in the composition of the population of  
292 MatAbs transferred. This possibility is suggested by the surprising observation that breed 2 pup  
293 sera had similar and significant levels of total anti-pre-F IgG antibodies at 4 and 8 weeks but no  
294 matNAbs could be measured at 8 weeks. In addition, in cotton rats as in humans, maternal  
295 antibodies, mostly IgA, are transferred to the newborn through lactation (32). Our data would  
296 then suggest that the protective antibodies transferred through this route may also be reduced by  
297 either consecutive pregnancies, time after immunization, and/or the age of the females.  
298 Potentially, maternal vaccination against RSV during each pregnancy will be necessary to boost  
299 the generation of protective MatNAbs that can be transferred to offspring of that pregnancy.

300           Studies in humans may shed light on the properties of antibody populations that may  
301 change affecting efficiency of placental transport. Human maternal antibodies transferred to the  
302 fetus are IgG with a strong preference for IgG1(33-37). Furthermore, there is evidence for  
303 subpopulations of IgG1 that are preferentially transferred (38). Antibodies transferred to the fetus  
304 contain preferentially an Fc domain that efficiently binds to FcRn (Fc receptor neonate), which is  
305 largely responsible for transplacental transit of antibodies (33, 39, 40). In addition, it is reported  
306 that antibodies transferred are preferentially those with NK cell activating activity and are  
307 preferentially modified with galactose containing oligosaccharide side chains (41, 42). How these  
308 properties of maternal antibodies may evolve with time after immunization (or infection),  
309 pregnancies, or with maternal age is not clear. Notably, it has been reported that galactose  
310 content as well as sialic acid content of the Fc domain of antibodies decreases with age (43) but  
311 the mechanisms involved are not well understood. Results presented here, the differential levels  
312 of protection transferred to the cotton rat pups in breed 1 and breed 2, are consistent with such  
313 an evolution in properties of antibodies in immunized dams to those less compatible with placental  
314 transfer. It will be important in considerations of the use of maternal RSV vaccines to determine  
315 how a second immunization (boost) of CR dams during a second pregnancy affects the efficiency  
316 of transfer of protective antibodies to offspring of that pregnancy.

317

## 318 **Methods**

### 319 **Preparation, characterization, and validation of VLP stocks**

320  
321 VLPs used as immunogens were based on the core proteins of Newcastle disease virus  
322 (NDV) M and NP proteins and contained the RSV F and G glycoproteins (44-46). The RSV  
323 proteins were assembled into the VLPs as chimera proteins with the sequences of the ectodomain  
324 of RSV F and G glycoproteins fused to the transmembrane and cytoplasmic domains of the NDV  
325 F and HN proteins, respectively. Three different VLPs were prepared, each containing the same  
326 RSV G chimera protein but with a different mutant F chimera protein. One VLP contained the  
327 DS-Cav1 pre-fusion F protein (30), while another VLP contained UC-3 F (30), a pre-fusion F  
328 protein with the cleavage site and intervening p27 sequences replaced with a seven-amino acid  
329 GS rich linker sequence as well as three point mutations, N67I, S215P, D486N, similar to the SC-  
330 TM F protein described by Krarup, et al. (47) A third VLP contained the post-F protein (30) and  
331 was used as a control, as previously described. The two pre-fusion F proteins also contained the  
332 foldon sequence inserted between the RSV F protein ectodomain and the NDV F protein  
333 transmembrane domain to stabilize further the pre-fusion conformation.

334 The VLPs were prepared by transfecting avian cells (ELL-0 from American Type Culture  
335 Collection) with cDNAs encoding the NDV M and NP proteins, the G protein chimera, and one of  
336 the mutant F chimera proteins (DS Cav1, UC-3 F, or post F). VLPs released into the cell  
337 supernatant were purified as previously described (48) and the F and G protein content of purified  
338 VLPs were quantified by Western blots and by monoclonal antibody (mAb) binding to the VLPs  
339 as previously described (18, 30). VLP stocks were adjusted for equivalent levels of F protein (18,  
340 30). The pre-fusion or post fusion conformation of the F protein in the VLPs was validated by  
341 assessing the binding of mAbs specific to the pre-fusion form of the F protein to the VLPs as  
342 previously reported (18, 30).

### 343 **Preparation of soluble F proteins**

344 Expi293F cells were transfected with cDNAs encoding the soluble DS-Cav1 pre-F protein  
345 or the soluble UC-3 pre-F protein. At six days post transfection, total cell supernatants were  
346 collected, cell debris removed by centrifugation, and the soluble polypeptides were purified on  
347 columns using the His tag and then the streptavidin tag (18, 49). Purified soluble DS Cav1 pre-F  
348 protein and soluble UC-3 pre-F protein efficiently bound to pre-fusion specific mAbs AM14 and  
349 D25 (30).

### 350 **Quantification of NP, M, H/G and VLP associated F proteins or soluble F proteins**

351 For Western blots, proteins were resolved on 8% Bis-Tris gels (NuPage,  
352 ThermoFisher/Invitrogen). Quantifications of NP, M, H/G proteins, and RSV F/F proteins in VLPs  
353 or in soluble F protein preparations (pre-F, post-F) were accomplished after their separation in  
354 polyacrylamide gels followed by silver staining (Pierce Silver Stain, ThermoFisher) or Western  
355 blots of the proteins in parallel with protein standards as previously described (18, 49).

### 356 **ELISA**

357 For determination of anti-pre F protein IgG antibody titers, wells of microtiter plates  
358 (ThermoFisher/Costar) were coated with either purified soluble DS Cav1 F protein or soluble UC-  
359 3 F protein (30 ng/well) and incubated overnight at 4°C, then blocked with 2% BSA for 16 hours.  
360 Different dilutions of sera, in PBS-2% BSA and 0.05% Tween, were added to each well and  
361 incubated for 2 hours at room temperature. Wells were then washed with PBS, incubated with  
362 chicken anti-cotton rat IgG antibody (Abnova PAB29753) coupled to HRP , and incubated for 1.5  
363 hours at room temperature. Bound HRP was detected using TMB (3,3',5,5'-tetramethylbenzidin,  
364 ThermoFisher34028) and the reaction was stopped with 2N sulfuric acid. Color was read in  
365 SpectraMax Plus Plate Reader (Molecular Devices) using SoftMax Pro software. Amounts of IgG  
366 (ng/ml) in each dilution were calculated using a standard curve generated using defined amounts  
367 of purified cotton rat IgG.

### 368 **RSV Neutralization**



369 RSV was grown in Hep2 cells, and RSV plaque assays were accomplished on Hep2 cells as  
370 previously described (18, 49). Antibody neutralization assays in a plaque reduction assay have  
371 been previously described (49). Neutralization titer was defined as  $\log_2$  of the reciprocal of the  
372 dilution of serum that reduced virus titer by 60%.

### 373 **Animals**

374 *Sigmodon hispidus* cotton rats (CR) were obtained from the inbred colony maintained at  
375 Sigmovir Biosystems, Inc (Rockville, MD). All studies were conducted under applicable laws and  
376 guidelines and after approval from the Sigmovir Biosystems, Inc. Institutional Animal Care and  
377 Use Committee. Animals were housed in large polycarbonate cages and fed a standard diet of  
378 rodent chow and water ad libitum. Animals were pre-bled before inclusion in the study to rule out  
379 the possibility of pre-existing antibodies against RSV. The colony was monitored for antibodies  
380 to paramyxoviruses and rodent viruses and no such antibodies were found. All cotton rats born  
381 as a result of breeding during these studies were used for RSV challenge at 4, 6, or 8 weeks of  
382 age, as indicated, and are referred to as "pups" or "offspring".

### 383 **Quantification of bone marrow associated anti-pre-F IgG secreting long lived plasma cells** 384 **(LLPC).**

385 CR bone marrow cells were prepared as previously described (31). To quantify LLPC in  
386 bone marrows, wells of ELISpot plates (Millipore) were coated overnight with purified soluble  
387 pre-F protein (30 ng/well in PBS). Wells were washed and blocked for one hour in complete  
388 media. Four-fold serial dilutions of bone marrow cells were added, in triplicate to pre-coated  
389 wells and incubated at 37°C for 6 hours. Plates were washed and blocked overnight in PBS  
390 containing 1% BSA. Wells were incubated with HRP conjugated chicken anti-cotton rat IgG  
391 (1/2000 dilution of Abnova PAB29753) in PBS containing 1% BSA, incubated at room  
392 temperature, washed, incubated AEC substrate (BD Biosciences AEC substrate set, 551951) at

393 room temperature until spots appear. Wells were washed and spots counted using CTL  
394 Immunospot S5 (46, 50)

### 395 **Experimental design**

396 Three-week-old female cotton rats (dams) were tagged and separated into the indicated  
397 groups (Figure 1, panel B). Female cotton rats were bled and then the indicated groups were  
398 primed by RSV A/Long intranasal infection using a dose of  $10^5$  PFU/animal in 50  $\mu$ l. Eight weeks  
399 later (d56), females were paired with RSV negative males ~2 weeks older than the females for  
400 mating (breed 1). Females were bled for serum collection at days 70, 84 (just before delivery),  
401 141, 184, 231, 277, and 318 post priming. At day 70 different groups of primed and pregnant  
402 cotton rats were immunized with UC-3 F VLPs with 25, 75, 100, or 150  $\mu$ g total VLP protein/animal  
403 (5, 15, 20, or 30  $\mu$ g F protein), or mock immunized with PBS buffer (Figure 1). Other groups of  
404 pregnant cotton rats were immunized with DS-Cav1 F VLPs or post-F VLPs with 100  $\mu$ g total VLP  
405 protein/animal (20  $\mu$ g F protein) (Figure 1). Dams delivered pups at approximately day 84. Dams  
406 were bred again at day 156 without additional immunization (breed 2). Breed 2 pups were  
407 delivered on or about day 184. Breed 1 pups were bled and challenged with RSV A/Long ( $10^5$   
408 PFU/animal) at 4 or 6 weeks of age. Breed 2 pups were bled and challenged with RSV at 4 or 8  
409 weeks after birth. All pups were sacrificed on day 4 post challenge. Pup serum NAb and total  
410 anti-pre-F IgG and nose and lung viral titers were measured, as previously described (18). Dams  
411 were kept in the study for an additional 134 days after delivery of breed 2 pups for additional  
412 serum collection.

### 413 **Statistical analysis**

414 Statistical analyses (student-*t* test) of data were accomplished using Graph Pad Prism 9  
415 software.

### 416 **Acknowledgements**

417

418 This research was funded by grants AI109926 (J.C.G.B) and AI043896 (TM) from the National  
419 Institutes of Health. We thank Jason McLellan and Judy Beeler for F protein mAbs. We thank  
420 Steven Hatfield for significant technical help. We thank Mr. Charles Smith, Martha Malache,  
421 and Ana Rivera for the animal care service.

422

423

## 424 **Literature Cited**

- 425 1. Thompson W, Shay DK, Weintraub E, et al. Mortality associated with influenza and  
426 respiratory syncytial virus in the United States. *JAMA*. 2003;289(2):179-86.
- 427 2. Shi T, McAllister DA, O'Brien KL, Simoes EAF, et al. Global, regional, and national disease  
428 burden estimates of acute lower respiratory infections due to respiratory syncytial virus in young  
429 children in 2015: a systematic review and modelling study. *The Lancet*. 2017;390(10098):946-58.
- 430 3. Karron RA. Respiratory syncytial virus and parainfluenza virus vaccines. In: Plotkin SA,  
431 Orenstein WA, Offit P, editors. *Vaccines*. 6. 5th ed: Saunders-Elsevier; 2008. p. 1146.
- 432 4. McLellan JS, Chen M, Leung S, Graepel KW, Du X, Yang Y, et al. Structure of RSV Fusion  
433 Glycoprotein Trimer Bound to a Prefusion-Specific Neutralizing Antibody. *Science*.  
434 2013;340(6136):1113-7.
- 435 5. McLellan JS, Chen M, Joyce MG, Sastry M, Stewart-Jones GBE, Yang Y. Structure-based  
436 design of a fusion glycoprotein vaccine for respiratory syncytial virus. *Science*. 2013;342:592-8.
- 437 6. Kim HW, Canchola JG, Brandt CD, Pyles G, Chanock RM, Jensen K, et al. RESPIRATORY  
438 SYNCYTIAL VIRUS DISEASE IN INFANTS DESPITE PRIOR ADMINISTRATION OF ANTIGENIC  
439 INACTIVATED VACCINE12. *American Journal of Epidemiology*. 1969;89(4):422-34.
- 440 7. Kapikian AZ, Mitchell RH, Chanock RM, Shvedoff RA, Stewart CE. AN EPIDEMIOLOGIC  
441 STUDY OF ALTERED CLINICAL REACTIVITY TO RESPIRATORY SYNCYTIAL (RS) VIRUS INFECTION IN  
442 CHILDREN PREVIOUSLY VACCINATED WITH AN INACTIVATED RS VIRUS VACCINE. *American*  
443 *Journal of Epidemiology*. 1969;89(4):405-21.
- 444 8. Fulginiti VA, Eller JJ, Sieber OF, Joyner JW, Minamitani M, Meiklejohn G. RESPIRATORY  
445 VIRUS IMMUNIZATION A FIELD TRIAL OF TWO INACTIVATED RESPIRATORY VIRUS VACCINES; AN  
446 AQUEOUS TRIVALENT PARAINFLUENZA VIRUS VACCINE AND AN ALUM-PRECIPIATED  
447 RESPIRATORY SYNCYTIAL VIRUS VACCINE1. *American Journal of Epidemiology*. 1969;89(4):435-  
448 48.
- 449 9. Chin J, Magoffin RL, Shearer LA, Schieble JH, Lennett EH. Field evaluation of a respiratory  
450 syncytial virus vaccine and a trivalent parainfluenza virus vaccine in a pediatric population. *Am J*  
451 *Epidemiol*. 1969;89:449-63.
- 452 10. Niewiesk S. Maternal Antibodies: Clinical Significance, Mechanism of Interference with  
453 Immune Responses, and Possible Vaccination Strategies. *Frontiers in Immunology*. 2014;5:446.

- 454 11. Vono M, Eberhardt CS, Auderset F, Mastelic-Gavillet B, Lemeille S, Christensen D, et al.  
455 Maternal Antibodies Inhibit Neonatal and Infant Responses to Vaccination by Shaping the Early-  
456 Life B Cell Repertoire within Germinal Centers. *Cell Reports*. 2019;28(7):1773-84.e5.
- 457 12. Wong DT, Ogra PL. Neonatal respiratory syncytial virus infection: role of transplacentally  
458 and breast milk-acquired antibodies. *J of Virol*. 1986;57(3):1203.
- 459 13. Stensballe LG, Ravn H, Kristensen K, Meakins T, Aaby P, Simoes EAF. Seasonal Variation of  
460 Maternally Derived Respiratory Syncytial Virus Antibodies and Association with Infant  
461 Hospitalizations for Respiratory Syncytial Virus. *J of Pediatrics*. 2009;154(2):296-8.e1.
- 462 14. Shao H-Y, Chen Y-C, Chung N-H, Lu Y-J, Chang C-K, Yu S-L, et al. Maternal immunization  
463 with a recombinant adenovirus-expressing fusion protein protects neonatal cotton rats from  
464 respiratory syncytia virus infection by transferring antibodies via breast milk and placenta.  
465 *Virology*. 2018;521:181-9.
- 466 15. Marchant A, Sadarangani M, Garand M, Dauby N, Verhasselt V, Pereira L, et al. Maternal  
467 immunisation: collaborating with mother nature. *The Lancet Infectious Diseases*.  
468 2017;17(7):e197-e208.
- 469 16. Heath PT, Culley FJ, Jones CE, Kampmann B, Le Doare K, Nunes MC, et al. Group B  
470 streptococcus and respiratory syncytial virus immunisation during pregnancy: a landscape  
471 analysis. *The Lancet Infectious Diseases*. 2017;17(7):e223-e34.
- 472 17. Chu HY, Steinhoff MC, Magaret A, Zaman K, Roy E, Langdon G, et al. Respiratory Syncytial  
473 Virus Transplacental Antibody Transfer and Kinetics in Mother-Infant Pairs in Bangladesh. *J of*  
474 *Infect Dis*. 2014;210(10):1582-9.
- 475 18. Blanco JCG, Pletneva LM, McGinnes-Cullen L, Otoa RO, Patel MC, Fernando LR, et al.  
476 Efficacy of a respiratory syncytial virus vaccine candidate in a maternal immunization model.  
477 *Nature Comm*. 2018;9(1):1904-14.
- 478 19. Gkentzi D, Katsakiori P, Marangos M, Hsia Y, Amirthalingam G, Heath PT, et al. Maternal  
479 vaccination against pertussis: a systematic review of the recent literature. *Archives of Disease in*  
480 *Childhood - Fetal and Neonatal Edition*. 2017;102(5):F456.
- 481 20. Azziz-Baumgartner E, Grohskopf L, Patel M. Realizing the Potential of Maternal Influenza  
482 Vaccination. *JAMA*. 2021;325(22):2257-9.
- 483 21. Njuguna HN YN, Raza AA, Ahmed B, Tohme RA. Progress Toward Maternal and Neonatal  
484 Tetanus Elimination — Worldwide, 2000–2018. *MMWR Morb Mortal Wkly Rep*.  
485 2020;69(17):515-20.
- 486 22. Lambert L, Sagfors AM, Openshaw PJM, Culley FJ. Immunity to RSV in Early-Life. *Frontiers*  
487 *in Immunology*. 2014;5:466.
- 488 23. Ogilvie MM, Santhire Vathenen A, Radford M, Codd J, Key S. Maternal antibody and  
489 respiratory syncytial virus infection in infancy. *J of Med Virol*. 1981;7(4):263-71.
- 490 24. Lamprecht CL, Krause HE, Mufson MA. Role of Maternal Antibody in Pneumonia and  
491 Bronchiolitis Due to Respiratory Syncytial Vims. *Jl of Infect Dis*. 1976;134(3):211-7.
- 492 25. Glezen WP, Paredes A, Allison JE, Taber LH, Frank AL. Risk of respiratory syncytial virus  
493 infection for infants from low-income families in relationship to age, sex, ethnic group, and  
494 maternal antibody level. *J of Pediatrics*. 1981;98(5):708-15.
- 495 26. Jennings GT, Bachmann MF. The coming of age of virus-like particle vaccines. *Biol Chem*.  
496 2008;389:521-36.

- 497 27. Bachmann MF, Jennings GT. Vaccine delivery: a matter of size, geometry, kinetics and  
498 molecular patterns. *Nat Rev Immunol*. 2010;10(11):787-96.
- 499 28. Blanco JCG, Fernando LR, Zhang W, Kamali A, Boukhvalova MS, McGinnes-Cullen L, et al.  
500 Alternative Virus-Like Particle-Associated Prefusion F Proteins as Maternal Vaccines for  
501 Respiratory Syncytial Virus. *J of Virol*. 2019;93(23):e00914-19.
- 502 29. Cullen ML, Boukhvalova SM, Blanco CGJ, Morrison GT. Comparisons of Antibody  
503 Populations in Different Pre-Fusion F VLP-Immunized Cotton Rat Dams and Their Offspring.  
504 *Vaccines*. 2020;8(1).
- 505 30. Cullen ML, Schmidt RM, Torres MG, Capoferri AA, Morrison GT. Comparison of Immune  
506 Responses to Different Versions of VLP Associated Stabilized RSV Pre-Fusion F Protein. *Vaccines*.  
507 2019;7(1):21-41.
- 508 31. McGinnes Cullen L, Schmidt MR, Morrison TG. Effect of Previous Respiratory Syncytial  
509 Virus Infection on Murine Immune Responses to F and G Protein-Containing Virus-Like Particles.  
510 *J of Virol*. 2019;93(9):e00087-19.
- 511 32. Prince GA, Horswood RL, Camargo E, Koenig D, Chanock RM. Mechanisms of immunity to  
512 respiratory syncytial virus in cotton rats. *Infection and Immunity*. 1983;42(1):81-7.
- 513 33. Palmeira P, Quinello C, Silveira-Lessa AL, Zago CA, Carneiro-Sampaio M. IgG Placental  
514 Transfer in Healthy and Pathological Pregnancies. *Clinical and Developmental Immunology*.  
515 2012;2012:985646.
- 516 34. Vidarsson G, Dekkers G, Rispens T. IgG Subclasses and Allotypes: From Structure to  
517 Effector Functions. *Frontiers in Immunology*. 2014;5:520.
- 518 35. Wilcox CR, Holder B, Jones CE. Factors Affecting the FcRn-Mediated Transplacental  
519 Transfer of Antibodies and Implications for Vaccination in Pregnancy. *Frontiers in Immunology*.  
520 2017;8:1294.
- 521 36. Einarsdottir HK, Stapleton NM, Scherjon S, Andersen JT, Rispens T, van der Schoot CE, et  
522 al. On the Perplexingly Low Rate of Transport of IgG2 across the Human Placenta. *PLOS ONE*.  
523 2014;9(9):e108319.
- 524 37. Langel SN, Otero CE, Martinez DR, Permar SR. Maternal gatekeepers: How maternal  
525 antibody Fc characteristics influence passive transfer and infant protection. *PLOS Pathogens*.  
526 2020;16(3):e1008303.
- 527 38. Fu C, Lu L, Wu H, Shaman J, Cao Y, Fang F, et al. Placental antibody transfer efficiency and  
528 maternal levels: specific for measles, coxsackievirus A16, enterovirus 71, poliomyelitis I-III and  
529 HIV-1 antibodies. *Scientific Reports*. 2016;6(1):38874.
- 530 39. Roopenian DC, Akilesh S. FcRn: the neonatal Fc receptor comes of age. *Nature Reviews*  
531 *Immunology*. 2007;7(9):715-25.
- 532 40. Jennewein MF, Alter G. The Immunoregulatory Roles of Antibody Glycosylation. *Trends in*  
533 *Immunology*. 2017;38(5):358-72.
- 534 41. Jennewein MF, Goldfarb I, Dolatshahi S, Cosgrove C, Noelette FJ, Krykbaeva M, et al. Fc  
535 Glycan-Mediated Regulation of Placental Antibody Transfer. *Cell*. 2019;178(1):202-15.e14.
- 536 42. Mahan AE, Jennewein MF, Suscovich T, Dionne K, Tedesco J, Chung AW, et al. Antigen-  
537 Specific Antibody Glycosylation Is Regulated via Vaccination. *PLOS Pathogens*.  
538 2016;12(3):e1005456.

- 539 43. Pučić M, Knežević A, Vidič J, Adamczyk B, Novokmet M, Polašek O, et al. High Throughput  
540 Isolation and Glycosylation Analysis of IgG–Variability and Heritability of the IgG Glycome in Three  
541 Isolated Human Populations\*. *Molecular & Cellular Proteomics*. 2011;10(10):M111.010090.
- 542 44. Murawski MR, McGinnes LW, Finberg RW, Kurt-Jones EA, Massare M, Smith G. Newcastle  
543 disease virus-like particles containing respiratory syncytial virus G protein induced protection in  
544 BALB/c mice with no evidence of immunopathology. *J of Virol*. 2010;84:1110-23.
- 545 45. McGinnes LW, Gravel KA, Finberg RW, Kurt-Jones EA, Massare MJ, Smith G. Assembly and  
546 immunological properties of Newcastle disease virus-like particles containing the respiratory  
547 syncytial virus F and G proteins. *J of Virol*. 2011;85:366-77.
- 548 46. McGinnes L, Schmidt MR, Kenward SA, Woodland RT, Morrison TG. Murine Immune  
549 Responses to Virus-Like Particle-Associated Pre- and Postfusion Forms of the Respiratory  
550 Syncytial Virus F Protein. *J of Virol*. 2015;89:6835-47.
- 551 47. Krarup A, Truan D, Furmanova-Hollenstein P, Bogaert L, Bouchier P, Bisschop IJM, et al. A  
552 highly stable prefusion RSV F vaccine derived from structural analysis of the fusion mechanism.  
553 *Nat Commun*. 2015;6:8143-55.
- 554 48. McGinnes LW, Morrison TG. Newcastle Disease Virus-Like Particles: Preparation,  
555 Purification, Quantification, and Incorporation of Foreign Glycoproteins. *Current Protocols in*  
556 *Microbiology*: John Wiley & Sons, Inc.; 2013.
- 557 49. Cullen LM, Schmidt MR, Morrison TG. The importance of RSV F protein conformation in  
558 VLPs in stimulation of neutralizing antibody titers in mice previously infected with RSV. *Human*  
559 *Vaccines & Immunotherapeutics*. 2017:1-10.
- 560 50. Schmidt MR, McGinnes LW, Kenward SA, Willems KN, Woodland RT, Morrison TG. Long  
561 term and memory immune responses in mice against Newcastle disease virus-like particles  
562 containing respiratory syncytial virus glycoprotein ectodomains. *J Virol*. 2012;86:11654-62.

563

564

565

## 566 **Legend to Figure 1: Experimental design**

567 Panel A shows a diagram of the protocol to assess durability of maternal immunization. Groups  
568 of CR were primed with RSV (IN) at day 0. These animals were then bred twice, once at day 56,  
569 and the second at day 158. Groups of animals were immunized at day 70 with UC-3 F, DS Cav1  
570 F, or post F VLPs. Other groups were infected a second time with RSV or mock immunized.  
571 Offspring of dams were challenged with RSV at 4, 6, or 8 weeks after birth. Red arrows show  
572 times of serum acquisition. Panel B lists groups of dams (10 CR/group).

573

574 **Legend to Figure 2: Total ng/ml of serum anti-pre-F protein IgG**

575 The concentrations of anti-pre-F serum IgG in different groups of dams immunized with  
576 VLPs or RSV were assessed by ELISA using soluble UC-3 F (panels A, C, E) or soluble DS-Cav1 F  
577 (panels B, D, F) as target. Serum samples acquired in different groups of animals immunized with  
578 VLPs at each time point were pooled (panels A, B) and error bars show mean and standard  
579 deviation of three separate determinations. Results from serum in individual animals immunized  
580 with different concentrations of UC-3 F VLPs or 100 µg DS Cav1 F VLPs and acquired at days 84  
581 or 141 are shown in panels C-F. Mean for each group is shown as a horizontal black line.

582 \*p<0.05; \*\*p<0.01; \*\*\*p<0.001; \*\*\*\*p<0.0001

583

584 **Legend to Figure 3: Bone marrow associated long-lived plasma cells (LLPC) secreting anti-pre-**  
585 **F IgG.**

586 At day 318, bone marrows of dams were acquired and the numbers of cells secreting anti-  
587 pre-F IgG were measured as described in Methods. Results from bone marrows of individual  
588 animals are shown as log<sub>10</sub> of the numbers of positive cells in 10<sup>6</sup> cells. Immunogen in dams is  
589 shown on the x axis. Solid line indicates mean titers in each data set. \*p<0.05; \*\*p<0.01.

590

591 **Legend to Figure 4: Neutralization titers in dams**

592 The serum NAb titers in dams, primed with RSV at day 0 and immunized at day 70, at each  
593 time point are shown. NAb titers of sera from animals immunized with 100 µg VLP protein are  
594 shown in panels A-C while titers in animals immunized with RSV or mock immunized are shown  
595 in panels D and E. Panels A-E are presented as violin plots with individual animal data shown.

596 Mean and standard deviation are indicated by solid and dotted black lines, respectively. Panels  
597 F-H show results of individual animals immunized with 25, 75, or 150  $\mu\text{g}$  of UC-3 F VLPs. Mean  
598 of each group is shown as a black horizontal bar. Red and green dots: data from sera acquired  
599 just before delivery of breed 1 or 2, respectively. \* $p < 0.05$ ; \*\* $p < 0.01$ ; \*\*\* $p < 0.001$ ; \*\*\*\* $p < 0.0001$

600

#### 601 **Legend to Figure 5: Comparisons of total anti-pre-F IgG in offspring of immunized dams**

602 Shown are total anti-pre-F IgG (ng/ml) (shown on a  $\log_{10}$  scale) in individual offspring of  
603 breed 1 (panels A, and C) and breed 2 (panels B, D) dams immunized with 25, 75, 100, and 150  
604  $\mu\text{g}$  of UC-3F VLP, 100  $\mu\text{g}$  of DS-Cav1 VLPs, 100  $\mu\text{g}$  post F VLPs, RSV, or mock immunized. Pre-F  
605 IgG titers at four weeks after birth were determined using as target in ELISA soluble UC-3 F (panels  
606 A, B) or DS Cav1 F (panels C, D). Mean is indicated by horizontal black line. Panels E and F directly  
607 compare levels of total anti-pre-F IgG in sera from breed 1 and 2 offspring of dams immunized  
608 with 100  $\mu\text{g}$  of VLPs using soluble UC-3 F or DS Cav1 F or as target, respectively, and shown on a  
609 linear scale. Mean and standard deviation are indicated by dashed and dotted black line,  
610 respectively. \* $p < 0.05$ ; \*\* $p < 0.01$ ; \*\*\* $p < 0.001$ ; \*\*\*\* $p < 0.0001$ .

611

#### 612 **Legend to Figure 6: Protective Responses in offspring of immunized dams**

613 Panels A, B: neutralizing antibody titers in sera of individual offspring from breed 1 (panel A) or  
614 breed 2 (panel B).

615 Panels C and D: RSV titers in lungs of individual offspring from breed 1 or 2, respectively, after  
616 RSV challenge at 4 weeks after birth.



617 Panels E and F: RSV titers in nasal tissue of individual offspring from breed 1 or 2, respectively,  
618 after RSV challenge at 4 weeks after RSV challenge. Mean of each data set is indicated by solid  
619 black line. \* $p < 0.05$ ; \*\* $p < 0.01$ ; \*\*\* $p < 0.001$ ; \*\*\*\* $p < 0.0001$

620

621 **Legend to Figure 7: Durability of protection in breed 1 offspring**

622 Sera and tissues acquired at 4 weeks (panels A, C, E, G) or 6 weeks (panels B, D, F, H) after birth  
623 of breed 1 pups were assessed for total anti-pre-F IgG (panels A, B), NAb titers (panels C, D), lung  
624 titers (panels E, F) or nasal tissue titers (panels G, H) after RSV challenge; \* $p < 0.05$ ; \*\* $p < 0.01$ ;  
625 \*\*\* $p < 0.001$ ; \*\*\*\* $p < 0.0001$ .

626

627 **Legend to Figure 8: Durability of protection in breed 2 offspring**

628 Sera and tissues acquired at 4 weeks (panels A, C, E, G) or 8 weeks (panels B, D, F, H) after birth  
629 of breed 2 pups were assessed for total anti-pre-F IgG (panels A, B), NAb titers (panels C, D), RSV  
630 lung titers (panels E, F) or nasal tissue titers (panels G, H) after RSV challenge; \*\*\* $p < 0.001$ ;  
631 \*\*\*\* $p < 0.0001$ .

632

633 **Legend to Table 1: Total ng/ml anti-pre-F IgG in dam sera**

634 The mean ng/ml of anti-Pre-F I IgG in pools of sera from each group of dams from each  
635 time point after RSV priming was measured by ELISA using UC-3 F as target. Data from animals  
636 immunized with 100  $\mu$ g VLPs as well as RSV/RSV and RSV/Mock groups are shown. Numbers, +/-  
637 , below each value are the standard deviation of three separate determinations. Numbers in  
638 parentheses are the percent of IgG relative to levels at day 141.

639

640 **Legend to Table 2: Effect of different doses of UC-3 F VLPs on total sera ng/ml anti-pre-F**

641 **IgG**

642 The mean ng/ml of anti-pre-F IgG in pools of sera from each of four groups of UC-3 F VLP  
643 immunized dams at each time point after RSV priming was measured in ELISA using UC-3 F as  
644 target. Numbers, +/-, below each value are the standard deviations of three separate  
645 determinations. Numbers in parentheses are the percent of IgG relative to levels at day 141.

646

647 **Legend to Table 3: Comparisons of ng/ml off sera anti-pre-F IgG in dams and pups**

648 The mean and standard deviations, respectively, of titers of anti-pre-F IgG, measured by  
649 ELISA, in each of the 8 groups of dams at day 141 is shown on the first two lines. Lines 3 and 4  
650 show means and standard deviations, respectively, of anti-pre-F IgG titers in sera of breed 1  
651 offspring of each of the 8 groups of dams at four weeks after birth while lines 5 and 6 show similar  
652 data for offspring of breed 2.

653 Line 7 shows breed 1 pup titers as a percent of dam titers at day 141 while line 8 shows breed 2  
654 pup titers as a percent of dam titers at day 141.

655

656

657

658

Fig 1

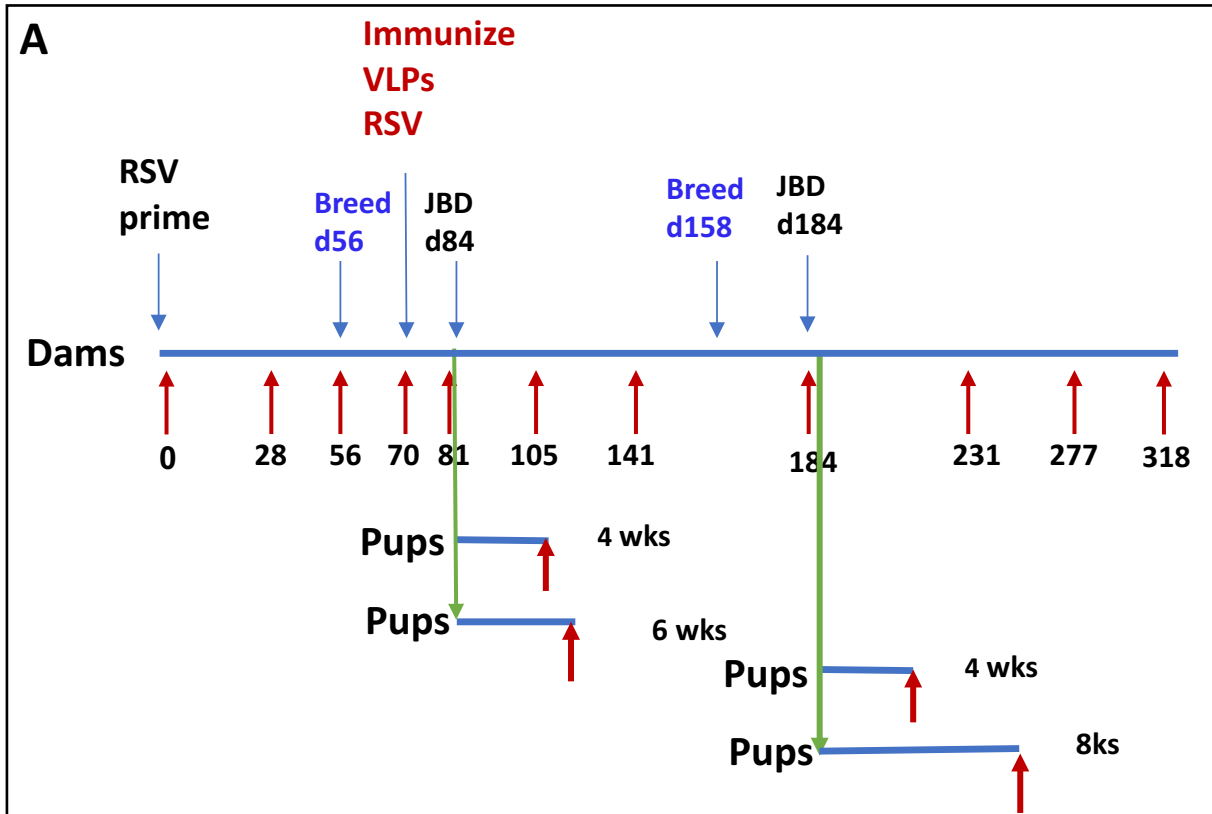

- B. Groups of CR**
- UC-3 F VLPs
    - 25  $\mu$ g
    - 75  $\mu$ g
    - 100  $\mu$ g
    - 150  $\mu$ g
  - DS Cav1 F VLPs
    - 100  $\mu$ g
  - Post F VLP
    - 100  $\mu$ g
  - RSV/RSV
  - RSV/mock
  - Mock/Mock

Fig 2

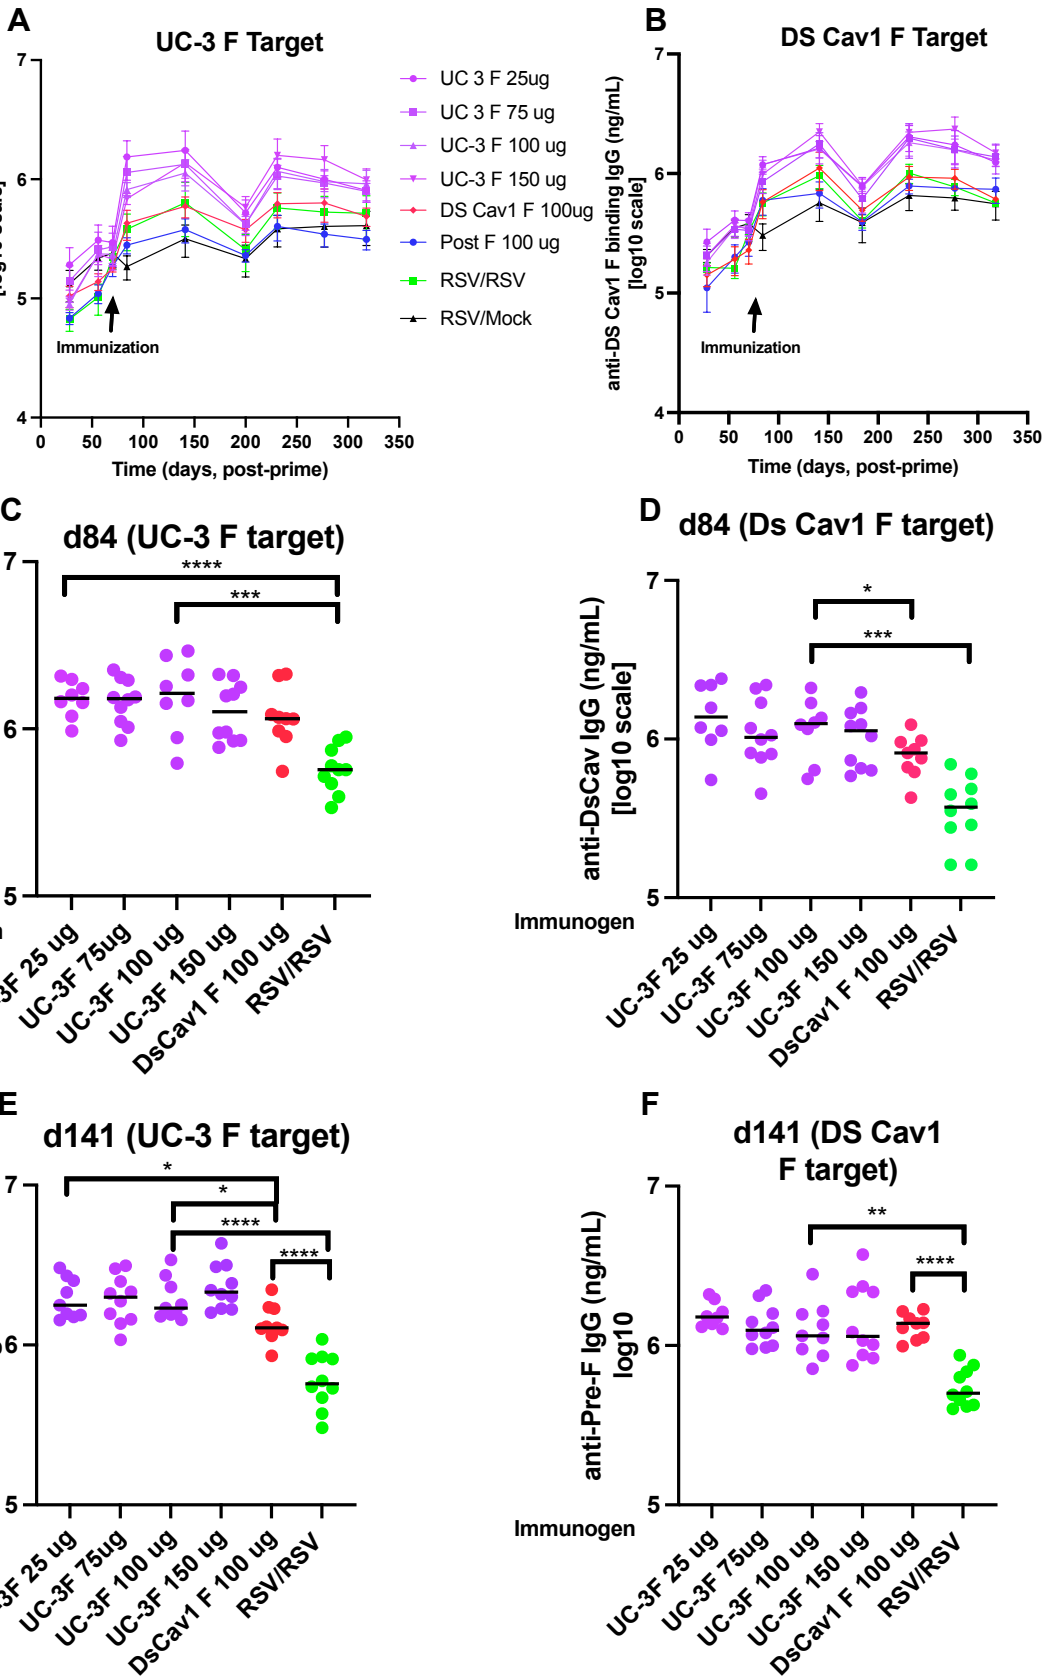

Fig 3

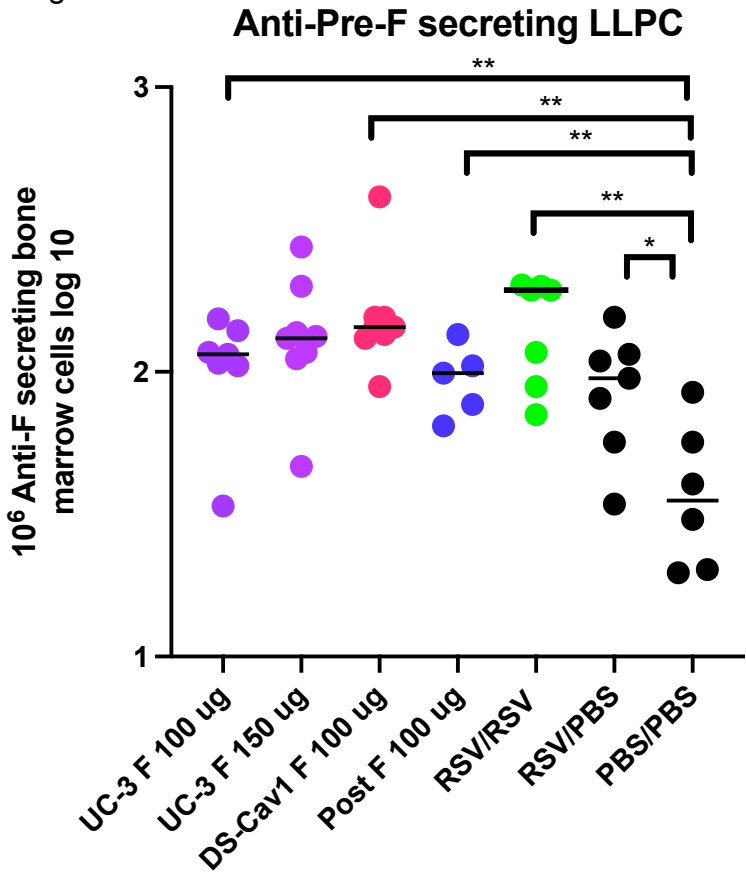

Fig 4

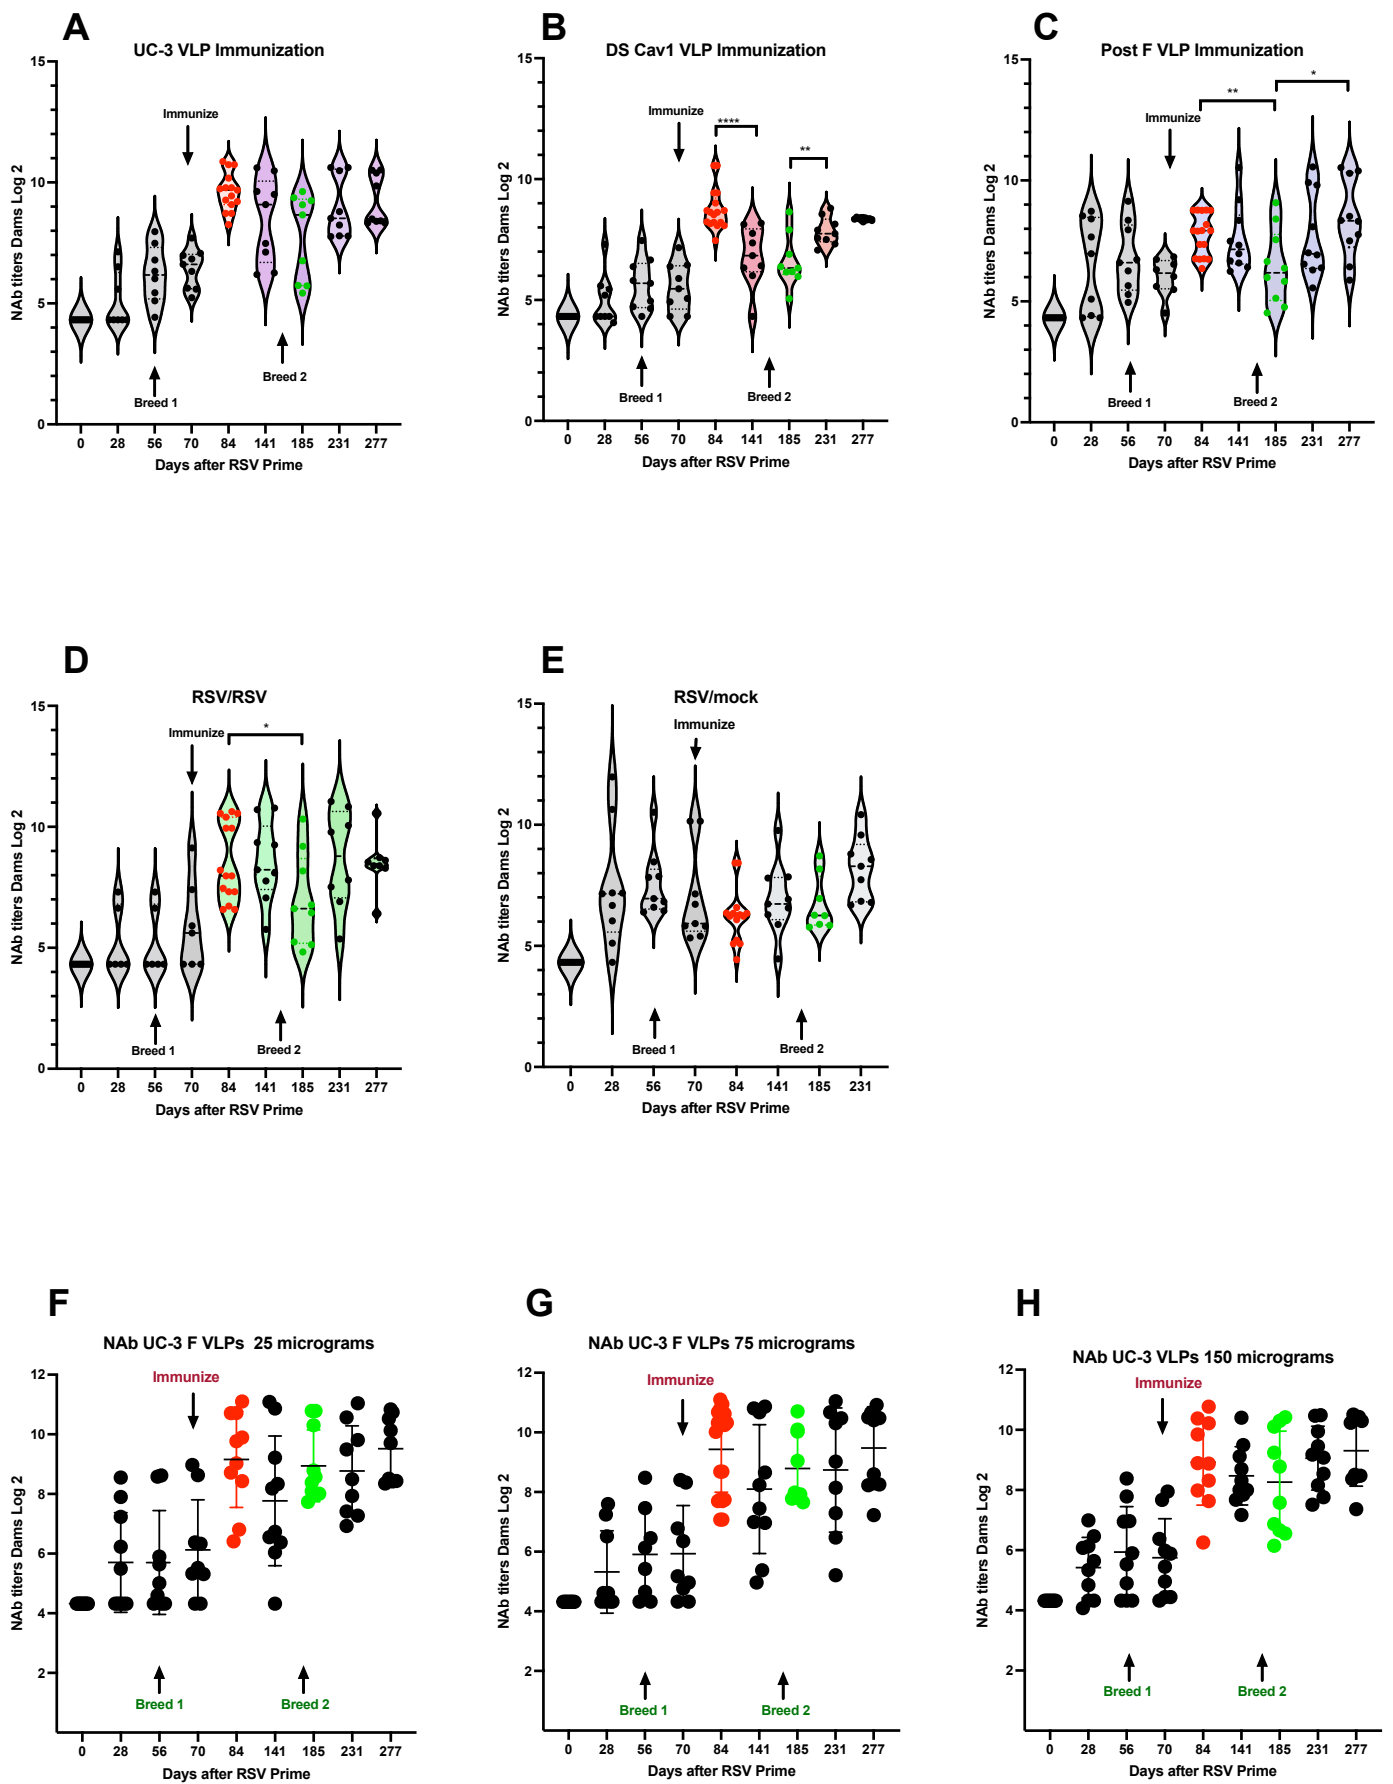

Fig 5

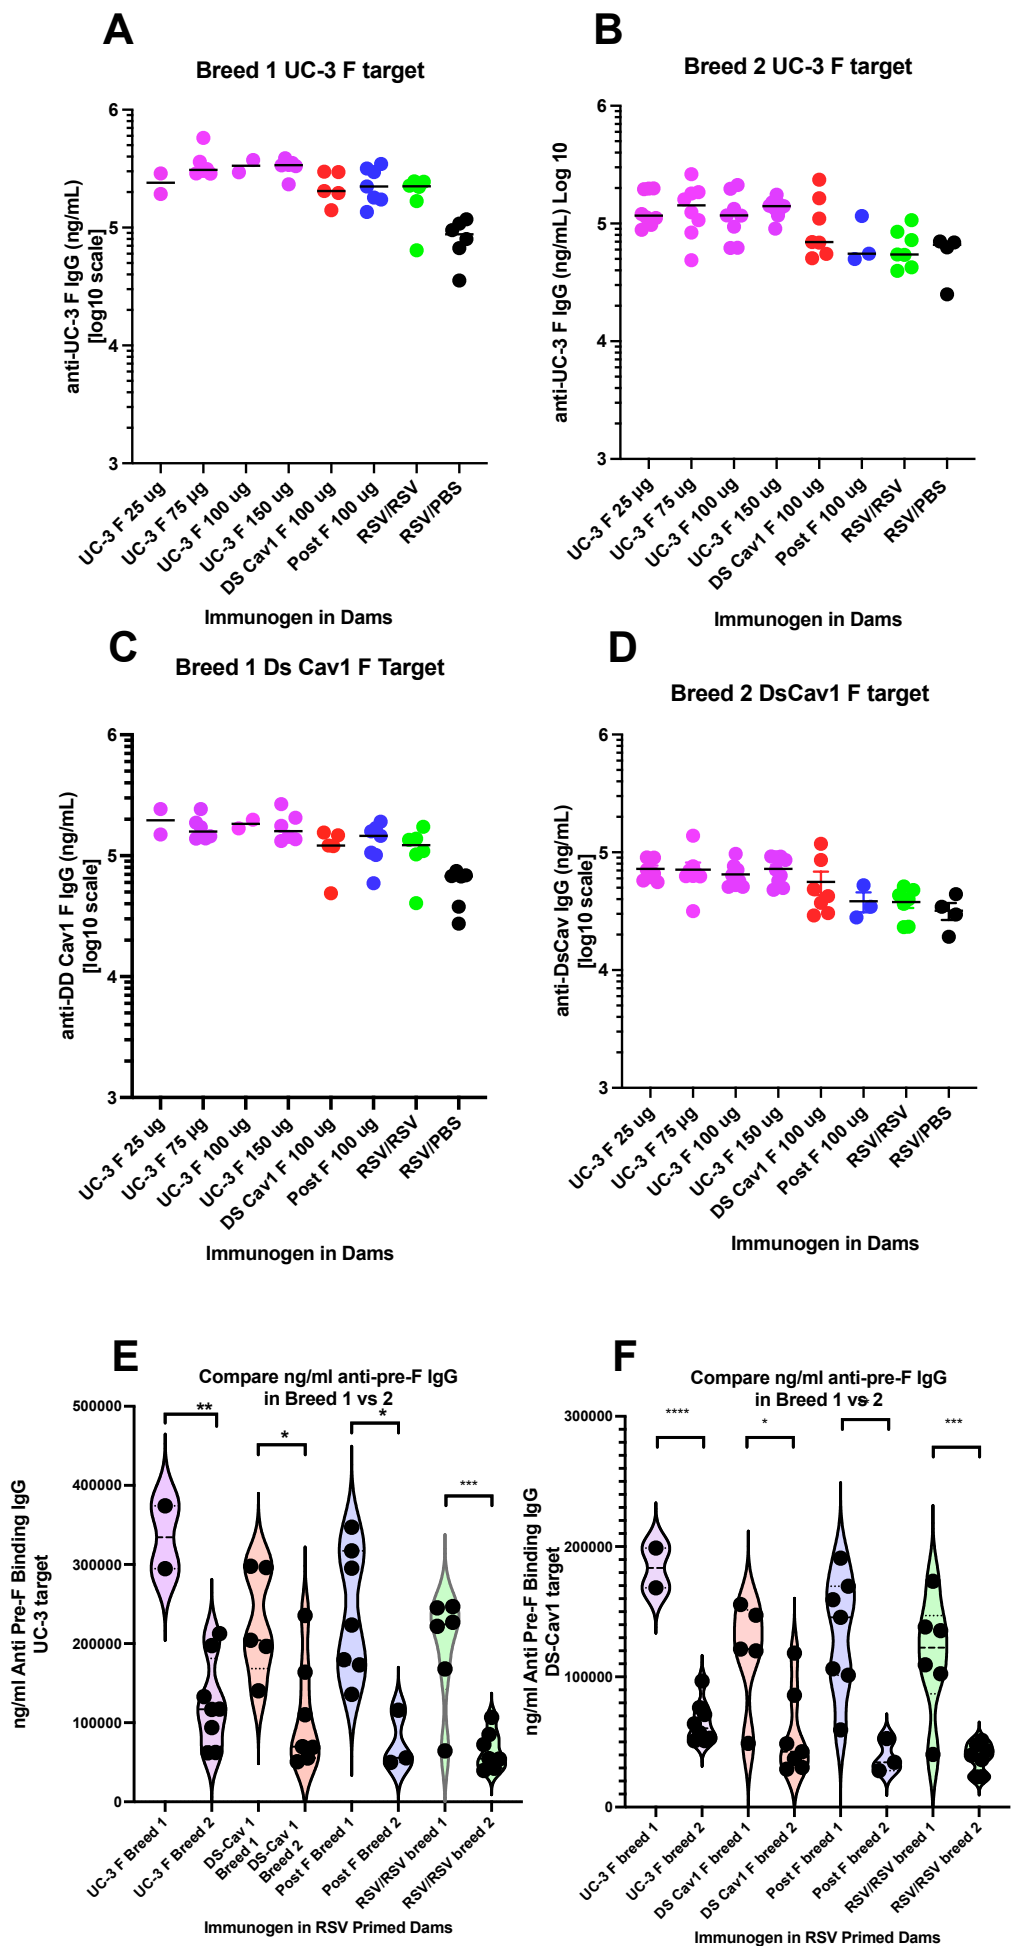

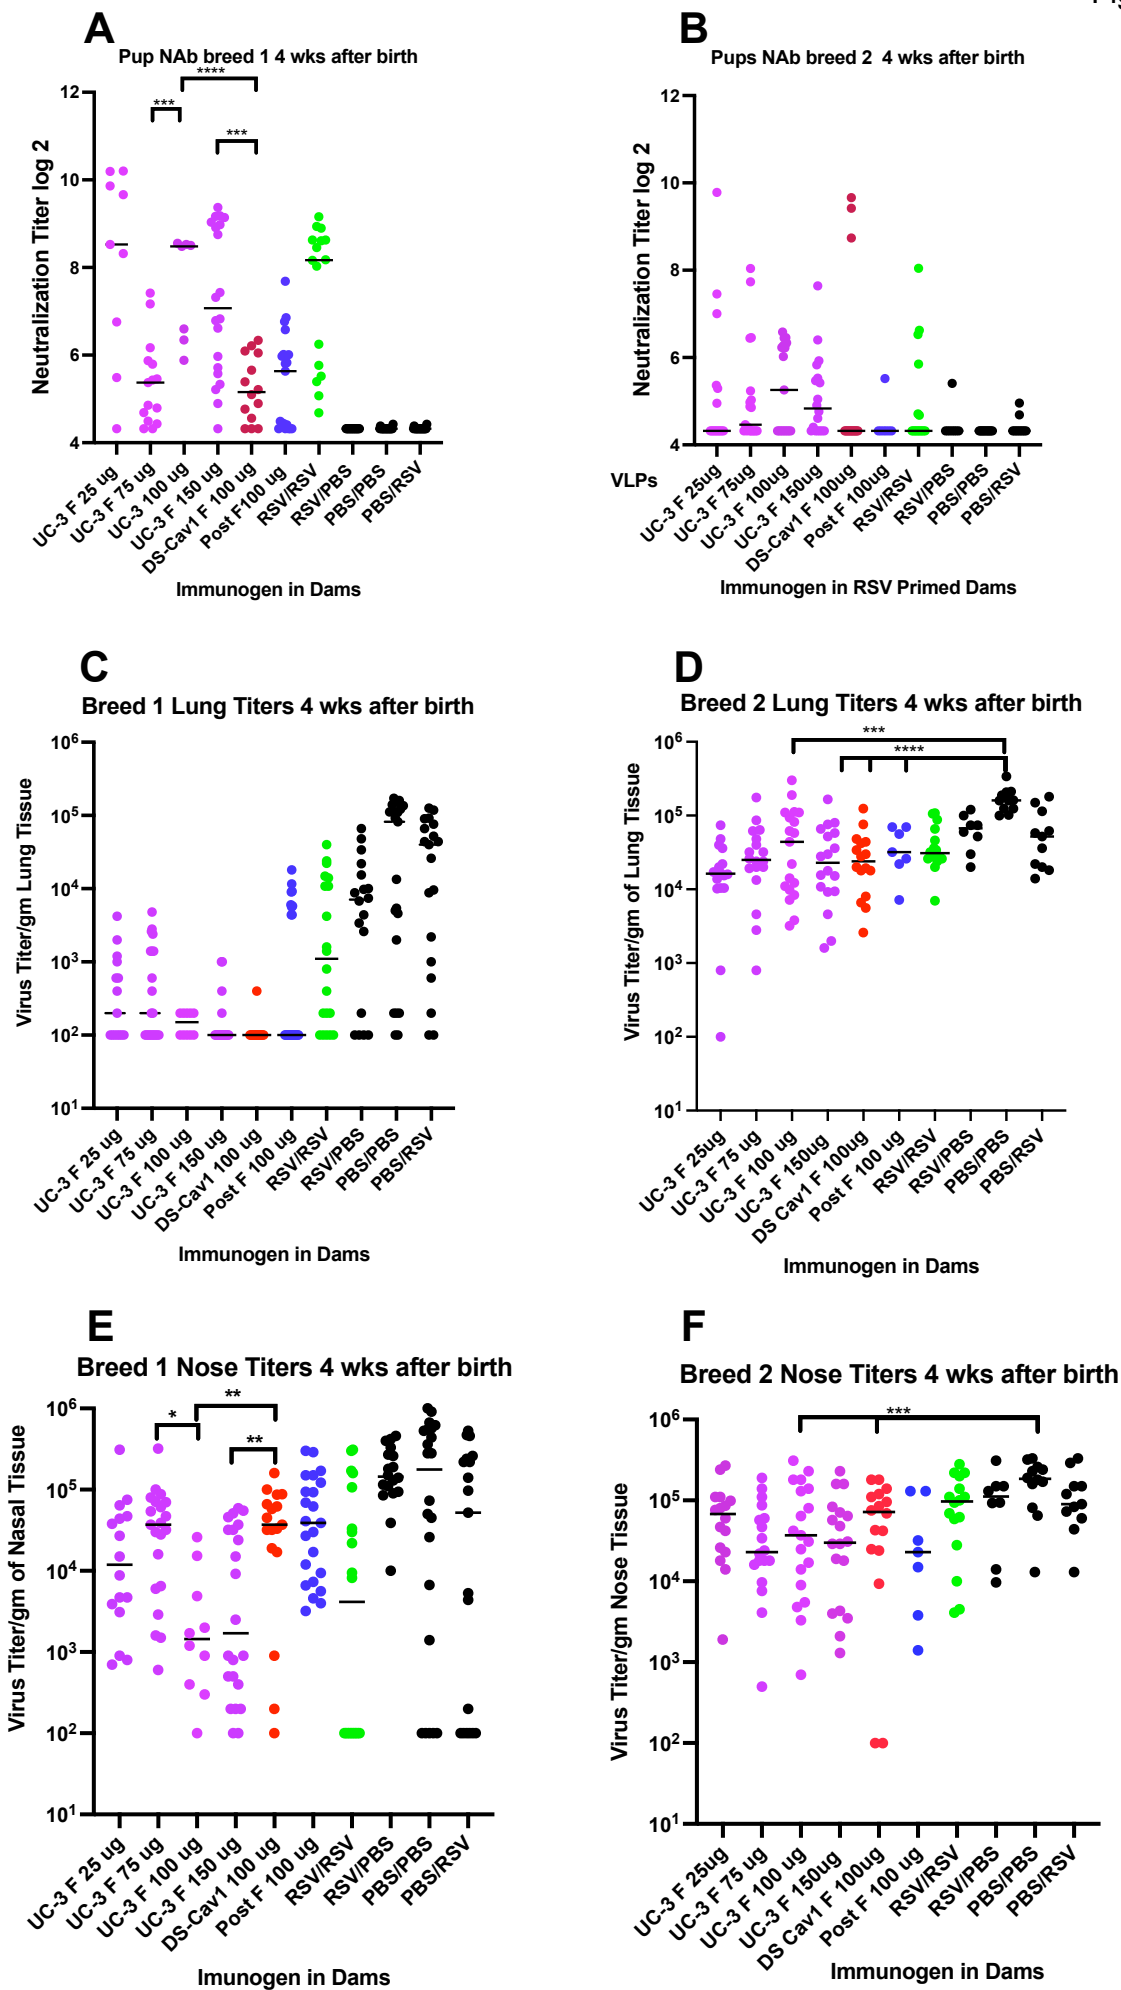



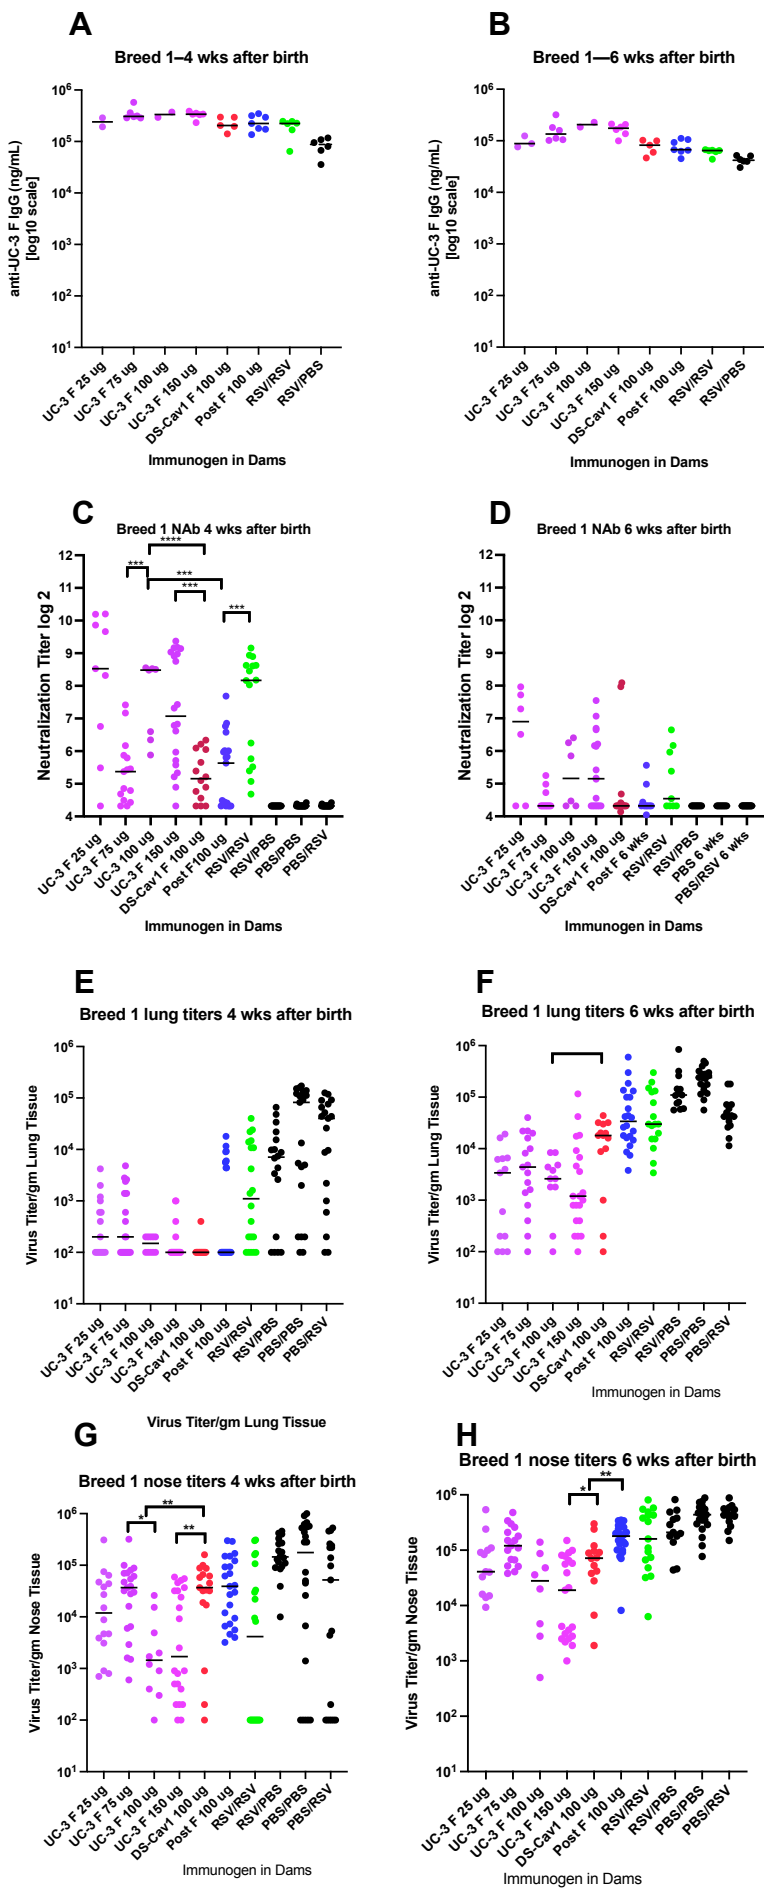

Fig 8

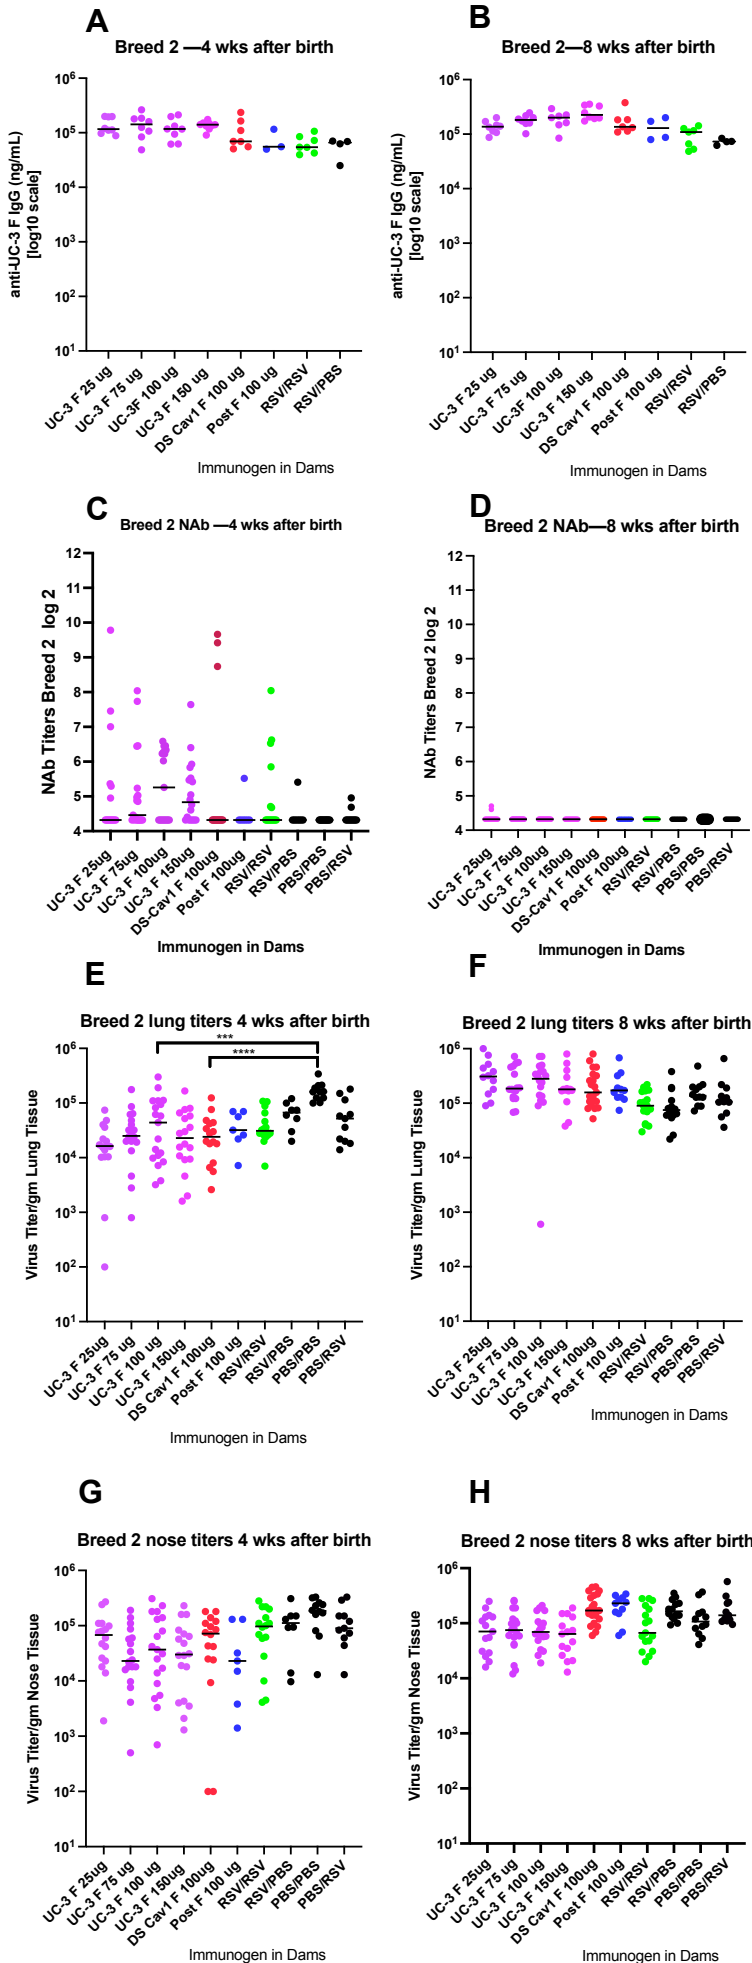

**Table 1: Total ng/ml Anti-pre-F IgG in Dam Sera**

| Day Post<br>RSV Prime | Immunogen                                               |                                                       |                                                        |                                                       |                                                       |
|-----------------------|---------------------------------------------------------|-------------------------------------------------------|--------------------------------------------------------|-------------------------------------------------------|-------------------------------------------------------|
|                       | UC-3F VLP(100ug)                                        | DS Cav1 VLP (100ug)                                   | post F VLP(100 ug)                                     | RSV/RSV                                               | RSV/mock                                              |
| 28                    | 1.8x10 <sup>5</sup><br>+/-6.9x10 <sup>4</sup>           | 1.41x10 <sup>5</sup><br>+/-4.9x10 <sup>4</sup>        | 1.10x10 <sup>5</sup><br>+/-7.1x10 <sup>4</sup>         | 1.63x10 <sup>5</sup><br>+/-2.6x10 <sup>4</sup>        | 2.0x10 <sup>5</sup><br>+/-4.4x10 <sup>4</sup>         |
| 56                    | 3.5x10 <sup>5</sup><br>+/- 1.1x10 <sup>5</sup>          | 1.92x10 <sup>5</sup><br>+/-8.9x10 <sup>4</sup>        | 2.00x10 <sup>5</sup><br>+/-9.2x10 <sup>4</sup>         | 1.61x10 <sup>5</sup><br>+/-5.0x10 <sup>4</sup>        | 3.3x10 <sup>5</sup><br>+/-9.8x10 <sup>4</sup>         |
| 70                    | 3.5x10 <sup>5</sup><br>+/-9.7x10 <sup>4</sup>           | 2.28x10 <sup>5</sup><br>+/-9.3x10 <sup>4</sup>        | 2.66x10 <sup>5</sup><br>+/-1.1x10 <sup>5</sup>         | 3.25x10 <sup>5</sup><br>+/-9.2x10 <sup>4</sup>        | 3.81x10 <sup>5</sup><br>+/-1.3x10 <sup>5</sup>        |
| 84                    | 1.19x10 <sup>6</sup> (74%)<br>+/-1.7x10 <sup>5</sup>    | 5.76x10 <sup>5</sup> (52%)<br>+/-2.7x10 <sup>5</sup>  | 5.96x10 <sup>5</sup> (87%)<br>+/-2.6x10 <sup>5</sup>   | 5.66x10 <sup>5</sup> (59%)<br>+/-2.1x10 <sup>5</sup>  | 3.03x10 <sup>5</sup> (53%)<br>+/-1.3x10 <sup>5</sup>  |
| 141                   | 1.61x10 <sup>6</sup> (100%)<br>+/-4.4x10 <sup>5</sup>   | 1.11x10 <sup>6</sup> (100%)<br>+/-6.8x10 <sup>5</sup> | 6.82x10 <sup>5</sup> (100%)<br>+/-2.92x10 <sup>5</sup> | 9.58x10 <sup>5</sup> (100%)<br>+/-3.6x10 <sup>5</sup> | 5.69x10 <sup>5</sup> (100%)<br>+/-2.9x10 <sup>5</sup> |
| 184                   | 6.95x10 <sup>5</sup> (43%)<br>+/-1.53x10 <sup>5</sup>   | 4.93x10 <sup>5</sup> (44%)<br>+/-1.6x10 <sup>5</sup>  | 3.94x10 <sup>5</sup> (58%)<br>+/-1.0x10 <sup>5</sup>   | 4.01x10 <sup>5</sup> (41%)<br>+/-8.8x10 <sup>4</sup>  | 3.89x10 <sup>5</sup> (68%)<br>+/-2.1x10 <sup>5</sup>  |
| 231                   | 1.80 x10 <sup>6</sup> (112%)<br>+/-7.13x10 <sup>5</sup> | 9.35x10 <sup>5</sup> (84%)<br>+/-3.7x10 <sup>5</sup>  | 7.85x10 <sup>5</sup> (115%)<br>+/-1.9x10 <sup>5</sup>  | 1.01x10 <sup>6</sup> (105%)<br>+/-3.2x10 <sup>5</sup> | 6.55x10 <sup>5</sup> (115%)<br>+/-2.8x10 <sup>5</sup> |
| 277                   | 1.58x10 <sup>6</sup> (98%)<br>+/-6.21x10 <sup>5</sup>   | 9.13x10 <sup>5</sup> (82%)<br>+/-2.9x10 <sup>5</sup>  | 7.51x10 <sup>5</sup> (110%)<br>+/-4.9x10 <sup>4</sup>  | 7.73x10 <sup>5</sup> (80%)<br>+/-2.1x10 <sup>5</sup>  | 6.23x10 <sup>5</sup> (100%)<br>+/-2.2x10 <sup>5</sup> |
| 318                   | 1.30x10 <sup>6</sup> (81%)<br>+/-2.66x10 <sup>5</sup>   | 6.10x10 <sup>5</sup> (55%)<br>+/-3.7x10 <sup>4</sup>  | 7.39x10 <sup>5</sup> (108%)<br>+/-3.1x10 <sup>5</sup>  | 5.67x10 <sup>5</sup> (59%)<br>+/-2.9x10 <sup>4</sup>  | 5.58x10 <sup>5</sup> (98%)<br>+/-2.6x10 <sup>5</sup>  |

**Table 2: Effect of different doses of UC-3 F VLPs on total sera ng/ml Anti-UC-3 F IgG**

| Day Post<br>RSV Prime | Immunogen                                               |                                                        |                                                        |                                                        |
|-----------------------|---------------------------------------------------------|--------------------------------------------------------|--------------------------------------------------------|--------------------------------------------------------|
|                       | UC-3F VLP(25 µg)                                        | UC-3 F VLP (75µg)                                      | UC-3 F (100 µg)                                        | UC-3 F (150 µg)                                        |
| 28                    | 2.68x10 <sup>5</sup><br>+/-1.2810 <sup>5</sup>          | 2.07x10 <sup>5</sup><br>+/-6.9x10 <sup>4</sup>         | 1.81x10 <sup>5</sup><br>+/-6.91x10 <sup>4</sup>        | 2.06x10 <sup>5</sup><br>+/-9.49x10 <sup>4</sup>        |
| 56                    | 4.09x10 <sup>5</sup><br>+/- 1.33x10 <sup>5</sup>        | 3.43x10 <sup>5</sup><br>+/-7.74x10 <sup>4</sup>        | 3.52x10 <sup>5</sup><br>+/-1.13x10 <sup>5</sup>        | 3.7x10 <sup>5</sup><br>+/-7.61x10 <sup>4</sup>         |
| 70                    | 4.04x10 <sup>5</sup><br>+/-1.14x10 <sup>5</sup>         | 3.34x10 <sup>5</sup><br>+/-5.98x10 <sup>4</sup>        | 3.57x10 <sup>5</sup><br>+/-9.77x10 <sup>4</sup>        | 3.40x10 <sup>5</sup><br>+/-1.16x10 <sup>5</sup>        |
| 84                    | 1.18x10 <sup>6</sup> (72%)<br>+/-3.41x10 <sup>5</sup>   | 8.53x10 <sup>5</sup> (48%)<br>+/-2.99x10 <sup>5</sup>  | 1.19x10 <sup>6</sup> (74%)<br>+/-1.76x10 <sup>5</sup>  | 9.87x10 <sup>5</sup> (44%)<br>+/-1.00x10 <sup>5</sup>  |
| 141                   | 1.64x10 <sup>6</sup> (100%)<br>+/-7.53x 10 <sup>5</sup> | 1.77x10 <sup>6</sup> (100%)<br>+/-7.32x10 <sup>5</sup> | 1.61x10 <sup>6</sup> (100%)<br>+/-4.44x10 <sup>5</sup> | 2.24x10 <sup>6</sup> (100%)<br>+/-6.65x10 <sup>5</sup> |
| 184                   | 7.84x10 <sup>5</sup> (48%)<br>+/-2.50x10 <sup>5</sup>   | 6.12x10 <sup>5</sup> (35%)<br>+/-2.52x10 <sup>5</sup>  | 7.75x10 <sup>5</sup> (48%)<br>+/-9.4x10 <sup>4</sup>   | 7.90x10 <sup>5</sup> (35%)<br>+/-1.91x10 <sup>5</sup>  |
| 231                   | 2.03x10 <sup>6</sup> (126%)<br>+/-8.59x10 <sup>5</sup>  | 1.98x10 <sup>6</sup> (112%)<br>1.10x10 <sup>5</sup>    | 1.81x10 <sup>6</sup> (112%)<br>+/-7.13x10 <sup>5</sup> | 2.21x10 <sup>6</sup> (98%)<br>+/-5.75x10 <sup>5</sup>  |
| 277                   | 1.73x10 <sup>6</sup> (108%)<br>+/-6.21x10 <sup>5</sup>  | 1.58x10 <sup>6</sup> (89%)<br>+/-2.9x10 <sup>5</sup>   | 1.58 x10 <sup>6</sup> (98%)<br>+/-4.9x10 <sup>4</sup>  | 2.36x10 <sup>6</sup> (105%)<br>+/-2.1x10 <sup>5</sup>  |
| 318                   | 1.24x10 <sup>6</sup> (73%)<br>+/-1.50x10 <sup>5</sup>   | 1.38x10 <sup>6</sup> (78%)<br>+/-6.68x10 <sup>5</sup>  | 1.30x10 <sup>6</sup> (81%)<br>+/-2.66x10 <sup>5</sup>  | 1.49x10 <sup>6</sup> (66%)<br>+/-4.14x10 <sup>5</sup>  |

**Table 3: Sera titers in Dams and Pups**

| Total<br>Pre-F IgG       | Dams Immunization                                |                                                  |                                                  |                                                 |                                                |                                                   |                                                  |                                                  |
|--------------------------|--------------------------------------------------|--------------------------------------------------|--------------------------------------------------|-------------------------------------------------|------------------------------------------------|---------------------------------------------------|--------------------------------------------------|--------------------------------------------------|
|                          | UC-3 25                                          | UC-3 75                                          | UC-3 100                                         | UC-3 150                                        | DS Cav1 100                                    | Post F 100                                        | RSV/RSV                                          | RSV/PBS                                          |
| Dams<br>Day 141          | 1.63x10 <sup>6</sup><br>+/-7.5 x 10 <sup>5</sup> | 1.77 x 10 <sup>6</sup><br>+/-7.3x10 <sup>5</sup> | 1.61 x 10 <sup>6</sup><br>+/-4.4x10 <sup>5</sup> | 1.62x 10 <sup>6</sup><br>+/-6.6x10 <sup>5</sup> | 1.11x10 <sup>6</sup><br>+/-6.7x10 <sup>5</sup> | 6.82 x 10 <sup>5</sup><br>+/-2.92x10 <sup>5</sup> | 9.59 x 10 <sup>5</sup><br>+/-3.6x10 <sup>5</sup> | 5.69 x 10 <sup>5</sup><br>+/-2.9x10 <sup>5</sup> |
| Pups<br>Breed 1<br>4 wks | 2.40x10 <sup>5</sup><br>+/-6.7x10 <sup>4</sup>   | 3.55x10 <sup>5</sup><br>+/-1.1x10 <sup>4</sup>   | 3.34x10 <sup>5</sup><br>+/-5.6x10 <sup>4</sup>   | 3.30x10 <sup>5</sup><br>+/-5.1x10 <sup>4</sup>  | 2.27x10 <sup>5</sup><br>+/-6.8x10 <sup>4</sup> | 2.39x10 <sup>5</sup><br>+/-1.8x10 <sup>4</sup>    | 1.96x10 <sup>5</sup><br>+/- 7.0x10 <sup>4</sup>  | 8.39 x 10 <sup>4</sup><br>+/-2.9x10 <sup>4</sup> |
| Pups<br>Breed 2<br>4 wks | 1.37x10 <sup>5</sup><br>+/-4.0x10 <sup>4</sup>   | 1.44x10 <sup>5</sup><br>+/-6.7x10 <sup>4</sup>   | 1.24x10 <sup>5</sup><br>+/-5.6x10 <sup>4</sup>   | 1.37 x10 <sup>5</sup><br>+/-2.3x10 <sup>4</sup> | 1.08x10 <sup>5</sup><br>+/-6.8x10 <sup>4</sup> | 7.3x10 <sup>4</sup><br>+/-3.6x10 <sup>4</sup>     | 6.5x10 <sup>4</sup><br>+/-2.4x10 <sup>4</sup>    | 5.7x10 <sup>4</sup><br>+/-2.1x10 <sup>4</sup>    |
| % of Dam<br>Breed 1      | 15                                               | 20                                               | 21                                               | 20                                              | 20                                             | 35                                                | 20                                               | 15                                               |
| % of Dam<br>Breed 2      | 8                                                | 8                                                | 7                                                | 8                                               | 10                                             | 11                                                | 6                                                | 10                                               |
